1

## 2 **Nonenzymatic loop-closing ligation generates RNA hairpins and is a** 3 **template-free way to assemble functional RNAs**

4 L.-F. Wu<sup>1,2</sup>, Z. Liu<sup>1</sup>, S. J. Roberts<sup>1</sup>, M. Su<sup>1</sup> J. W. Szostak<sup>2\*</sup> and J. D. Sutherland<sup>1\*</sup>

### 5 **Affiliations:**

6 <sup>1</sup> MRC Laboratory of Molecular Biology, Francis Crick Avenue, Cambridge  
7 Biomedical Campus, Cambridge, CB2 0QH, UK.

8 <sup>2</sup> Howard Hughes Medical Institute, Department of Molecular Biology, and Center for  
9 Computational and Integrative Biology, Massachusetts General Hospital, Boston,  
10 Massachusetts 02114, United States; Department of Genetics, Harvard Medical School,  
11 Boston, Massachusetts 02115, United States.

12 \*Correspondence to: [johns@mrc-lmb.cam.ac.uk](mailto:johns@mrc-lmb.cam.ac.uk), [szostak@molbio.mgh.harvard.edu](mailto:szostak@molbio.mgh.harvard.edu)

13

14 **Abstract:** RNA hairpin loops are the predominant element of secondary structure in  
15 functional RNAs. The emergence of primordial functional RNAs, such as ribozymes  
16 that fold into complex structures that contain multiple hairpin loops, is generally  
17 thought to have been supported by template-directed ligation. However, template  
18 inhibition and RNA misfolding problems impede the emergence of function. Here we  
19 demonstrate that RNA hairpin loops can be synthesized directly from short RNA  
20 duplexes with single-stranded overhangs by nonenzymatic loop-closing ligation  
21 chemistry. We show that loop-closing ligation allows full-length functional ribozymes  
22 containing a hairpin loop to be assembled free of inhibitory template strands. This  
23 approach to the assembly of structurally complex RNAs suggests a plausible pathway  
24 for the emergence of functional RNAs before a full-length RNA copying process  
25 became available.

26

### 27 **Introduction**

28 Functional RNAs such as ribozymes, riboswitches and aptamers – both naturally  
29 occurring and those selected by in vitro evolution – adopt folded structures (1-5). The  
30 prebiotic generation of structured RNA is thus crucial to the emergence of functional  
31 ribozymes during the origin of life. However, the compact, folded structure required  
32 for catalysis is incompatible with the demand for an unstructured RNA as a template  
33 for copying. Thus, a fragmentation strategy has previously been explored to assemble  
34 full-length RNAs, based on the rationale that copying the unstructured, constituent  
35 fragments individually would be less problematic than copying the structured, full-  
36 length. The question of the emergence of functional RNA could then be divided into the  
37 synthesis/copying of the short fragments (6-8) followed by an assembly process leading  
38 to functional RNAs (9-14). Two strategies for the assembly process have been explored.  
39 Nicked duplex ligation to assemble full-length functional RNAs (9, 10) was first  
40 reported in 1966 (15, 16). The advantage of this strategy is that it allows many ways to  
41 position ligation junctions and template strands (splints) so as to assemble the unfolded  
42 form of the structured ribozyme (R to R<sup>L</sup> in Figure 1A, top pathway). However, this  
43 strategy is inevitably subject to template inhibition (7-10, 16), thus product purification  
44 (9) or elaborate template design (10) are needed to enable RNA function. A further

45 problem with the generation of complex structured RNAs is that the final structure is  
46 only realized during the folding stage ( $R^L$  to  $R$  in Figure 1A). In extant biology  
47 chaperones can guide the folding of functional RNAs (17,18), but, absent chaperones,  
48 proper folding of complex RNAs is usually imperfect, with a substantial fraction of  
49 molecules becoming trapped in metastable mis-folded states (19). An alternative  
50 strategy, which leaves the fragments non-covalently joined, divides a full-length  
51 functional RNA into shorter pieces by interrupting the RNA chain within loops ( $R$  to  
52  $R^*$  in Figure 1A). This strategy was pioneered by Doudna et al. three decades ago (11).  
53 The non-covalently assembled complexes generated in this way could retain function,  
54 but the loose structure typically leads to some loss of activity and greater sensitivity to  
55 conditions such as elevated temperature ( $R^*$  in Figure 1A) (11). This strategy has  
56 subsequently been explored for other ribozymes and for aptamers (12-14). We reasoned  
57 that if the nicked loops could be non-enzymatically sealed without disrupting the pre-  
58 structured assembly ( $R^*$  to  $R$  in Figure 1A), it would offer a new strategy to directly  
59 assemble full-length structured RNAs, potentially circumventing template inhibition,  
60 misfolding and disassembly issues simultaneously (Figure 1A).

61  
62 We conceived of loop-closing ligation as a means of surmounting the difficulties in the  
63 assembly of active ribozymes from smaller, easier-to-replicate fragments (Figure 1B).  
64 The idea of loop-closing ligation was inspired by thinking about ligation in the context  
65 of our newly discovered nicked loop aminoacyl-transfer chemistry (20), as opposed to  
66 the traditional nicked duplex scenario (Figure S1). The efficiency of nonenzymatic  
67 nicked duplex RNA ligation is due to the proximity of the 3'- and activated 5'-termini  
68 of two abutting strands imparted by template binding (Figure S1-i) (15,16). Similarly  
69 imparted proximity between the 3'-terminus of a primer and the activated 5'-phosphate  
70 of a monomer is the basis of template-directed RNA primer extension (21). In model  
71 studies of prebiotic ligation and primer extension, nucleotide activation has typically  
72 involved 5'-phosphorimidazolides (21,22). These are more reactive than the  
73 triphosphates used in extant biology and their reaction with the 3'-termini of RNA  
74 strands does not require macromolecular catalysis to proceed at a reasonable rate,  
75 although this high reactivity also results in unavoidable competing background  
76 hydrolysis (21,22). The proximity of the internal termini of a nicked RNA duplex can  
77 also be exploited in aminoacyl-transfer chemistry (23) (Figure S1-ii). Thus, if the 5'-  
78 phosphate terminus is converted into a mixed anhydride with an amino acid, aminoacyl  
79 transfer to the 3'-terminal diol occurs rather than ligation (Figure S1-ii). Remarkably,  
80 the folded-back conformation of the overhang sequence in a tRNA acceptor stem-  
81 overhang mimic also allows for interstrand aminoacyl-transfer (Figure S1-iii) (20)  
82 because the folded conformation of the overhang places its 3'-terminal diol in proximity  
83 to the 5'-aminoacyl-phosphate of the other strand (20, 24). Taken together (Figure S1-  
84 i to iii), these results suggested that this proximity might also lead to ligation if the 5'-  
85 phosphate is activated as a 5'-phosphorimidazolide (Figure 1B, Figure S1-iv). Iteration  
86 of such loop-closing ligation could allow for the assembly of complex RNA structures  
87 containing multiple stem-loops, without the need for any template to guide the  
88 assembly process.

89

## 90 **Results**

91 To test the feasibility of loop-closing ligation, a 5'-phosphorimidazolide activated RNA  
92 oligonucleotide (Im-p-AGCGA-3') together with some of the 5'-phosphorylated 5-mer  
93 (5'-p-AGCGA-3') from which it was prepared (50  $\mu$ M in total) was annealed to a 10-  
94 mer RNA (50  $\mu$ M) comprising the complementary strand and a 3'-overhang (5'-

95 UCGCUUGCCA-3', complementary sequence underlined) under typical nicked duplex  
96 ligation conditions (50 mM MgCl<sub>2</sub>, 200 mM NaCl, 50 mM HEPES, pH 8.0) (15). The  
97 reaction mixture was incubated at 20 °C and monitored by HPLC with 260 nm UV  
98 detection. After 7 days, all the Im-p-AGCGA-3' was consumed and a new peak  
99 appeared on HPLC chromatograms. The new peak had the same retention time as a  
100 synthetic standard of the expected 15-mer product of loop-closing ligation product. The  
101 apparent observed yield of 9 % based on total pentanucleotide corresponds to a  
102 corrected yield, based upon the percentage of Im-p-AGCGA-3' in the 5'-  
103 phosphorimidazole RNA preparation, of 16 %. The slow reaction rate ( $t_{1/2} = 40$  h,  $t_{1/2}$   
104 defined here as the "reaction half-life", is the combined rate of first-order consumption  
105 of Im-p-AGCGA resulting from both loop-closing ligation and competing hydrolysis.  
106 See Table 1 and Table S1-S4) of the loop-closing ligation is consistent with previous  
107 reports of slow nicked duplex ligation using 5'-phosphorimidazole RNAs (25). To  
108 increase the reaction rate, *N*-methylimidazole (*N*-MeIm), a nucleophilic catalyst (for  
109 detailed mechanism see Figure S2) (26), was added to the above reaction and found to  
110 boost the reaction rate in a concentration dependent manner. Ligation yields remained  
111 almost constant (around 30 % corrected) as *N*-MeIm concentrations were varied from  
112 10 to 100 mM, but the reaction half-life decreased from 40 hours to 0.6 hour as the  
113 concentration of *N*-MeIm changed from 0 mM to 200 mM (Table S1). After  
114 systematically exploring other parameters including temperature, pH, concentration of  
115 MgCl<sub>2</sub> and concentration of NaCl that affect the model reaction (Table S1-S4), a  
116 standard condition for loop-closing ligation (50 mM *N*-MeIm, 50 mM MgCl<sub>2</sub>, 200 mM  
117 NaCl and 50 mM HEPES, pH 8.0 at 20 °C) was chosen, in which the reactions proceed  
118 to completion in less than 10 hours.

119  
120 Considering the variety of hairpin loops that are present in functional RNAs (27-30),  
121 we wished to explore the scope of the loop-closing ligation. Using the overhang  
122 UGCCA as a reference sequence (30 % corrected yield, Entry 1, Table 1), we  
123 investigated the effect of varying the 3'-overhang sequence. Shortening the overhang  
124 length to 2 or 3 nucleotides resulted in very poor ligation yields (< 5 % corrected,  
125 Entries 1 to 4, Table 1, Figure S3-S6). This is presumably because a 2- or 3-nucleotide  
126 long overhang cannot easily adopt a productive folded-back conformation (27). In  
127 accordance with the structural observations of Puglisi et al. (24), a UCCA overhang  
128 gave a significantly higher yield than an ACCA overhang (15 % vs. 5 % corrected,  
129 Entries 5 and 6, Table 1, Figure S7-S8). Lengthening the overhang to 6-nucleotides  
130 decreased the corrected yield to 13 % (Entry 1 versus Entry 7, Table 1, Figure S9).  
131 Changing the G at the second position of the original 5-nucleotide overhang to each of  
132 the other three nucleobases had no major effect on ligation yield or rate (Entries 8 - 10,  
133 Table 1, Figure S10-S12). However, changing the 3'-terminal A into C or U decreased  
134 the yield significantly (4 % and 2 % corrected, respectively, Entries 11 and 12, Table  
135 1, Figure S13-S14), while changing the A into G was well tolerated (30 % corrected  
136 yield, Entry 13, Table 1, Figure S15). Changing the 3'-terminal ribonucleoside into  
137 either a 2'- or a 3'-deoxyribonucleoside suppressed the loop-closing ligation severely  
138 (< 2 % corrected yield in either case, Entries 14 and 15, Table 1, Figure S16-S17).  
139 These results show that the efficiency of the loop-closing ligation is highly dependent  
140 on the length and sequence of the overhang and the nature of the sugar moiety of the  
141 3'-terminal nucleoside. Although a more complete data set will be required to establish  
142 potential rules for the efficiency of loop-closing ligation, it seems that both the first and  
143 last nucleotides of the overhang play significant roles, with the former likely being  
144 important in allowing a U-turn conformation and the latter in stacking to the last base

145 pair of the stem. The effect of the sugar moiety of the 3'-terminal nucleoside might  
146 simply be explained by the lower pKa of the diol of a ribonucleoside relative to the  
147 single alcohol of a deoxynucleoside. However, it is noteworthy that the phosphodiester  
148 bonds formed by the loop-closing ligation are predominantly 2',5'-linked rather than  
149 the canonical 3',5'-linkage as determined by comparison to synthetic 2',5'-linked and  
150 3',5'-linked standards on RNA PAGE analysis (Figure S18). The introduction of 2',5'-  
151 linkages into functional RNAs has previously been demonstrated to be well tolerated  
152 (31) and will also be addressed further below.

153  
154 Having optimized conditions for loop-closing ligation and partly established its scope  
155 in terms of overhang length and sequence, we decided to apply loop-closing ligation to  
156 the construction of functional RNAs, beginning with the tRNA anticodon loop. We  
157 have previously proposed that the proximity of the 5'-phosphate and 2',3'-diol termini  
158 in a nicked loop might be responsible for both the non-enzymatic aminoacylation of the  
159 acceptor stem-overhang of a tRNA molecule and the closure of the distal anticodon  
160 loop by ligation (20). Taking the UGCCA overhang sequence we adopted in our  
161 previous aminoacylation study as a starting point, we realised that if we changed the  
162 A:U stem-closing base-pair into an A:C mismatch, the potential product of loop-closing  
163 ligation would mirror a typical tRNA anticodon loop (hepta-loop sequence  
164 CUGCCAA, Entry 16, Table 1). Indeed, when an A:C mismatch was introduced at the  
165 junction of the stem and overhang in our experimental system, loop-closing ligation  
166 was still observed (7 % corrected yield, Entry 16, Table 1, Figure S19). Interestingly,  
167 this hepta-loop product functionally resembles a tRNA anticodon loop, in that binding  
168 of this conventionally synthesized anticodon stem loop, with either a 2',5'- or a 3',5'-  
169 linkage between positions corresponding to residues 37 and 38 of tRNA, to  
170 oligonucleotides incorporating the complementary codon was experimentally verified  
171 by ITC (32) (see Methods and Figure S20). Moreover, the manner in which the loop  
172 was closed is also reminiscent of the enzymatic pathway of pre-tRNA processing after  
173 intron excision (33) (Figure S21).

174  
175 Extending the idea of forming tRNA-like molecules from shorter oligonucleotides, we  
176 targeted a tRNA minihelix – a truncated tRNA molecule consisting of the tRNA  
177 acceptor stem-overhang and the T $\Psi$ C stem-loop, and previously shown to be  
178 recognized and enzymatically aminoacylated by an aminoacyl-tRNA synthetase (34).  
179 Conceptually this target results from excision of the anticodon and D-stem-loops from  
180 tRNA followed by joining of the resultant termini by nicked duplex ligation (Figure  
181 2A). Applying the latter ligation and a T $\Psi$ C loop-closing ligation retrosynthetically, the  
182 tRNA minihelix can be disconnected into three fragments (Figure 2A). The RNA  
183 fragment destined to become the 5'-terminus of the tRNA minihelix (Frg-1) was 5'-  
184 FAM-labelled to enable convenient monitoring of the assembly process by gel  
185 electrophoresis. Both fragment 2 (p-Frg-2) and fragment 3 (p-Frg-3) were converted  
186 into phosphorimidazolides, Im-p-Frg-2 and Im-p-Frg-3 respectively, before mixing  
187 with Frg-1 (Figure 2B). Three FAM-labelled products (P1, P2 and P3 in observed yields  
188 of 5 %, 6 % and 0.3 % respectively) were observed after incubating all three fragments  
189 together (each at 50  $\mu$ M concentration) under standard loop-closing ligation conditions  
190 (Figure 2B, Lanes 1&2 in Figure 2C). P1 represents the off-target loop-closing ligation  
191 product of Frg-1 and Im-p-Frg-3, which results from the five base-pair duplex between  
192 Im-p-Frg-2 and Im-p-Frg-3. The identity of P1 was confirmed by the fact that it is the  
193 only product formed when Frg-1 and Im-p-Frg-3 are incubated together (6 % observed  
194 yield, Lane 4&5 in Figure 2C). P2 represents the on-pathway product of nicked duplex

195 ligation between Frg-1 and Im-p-Frg2; it is the only product observed (7 % observed  
196 yield, Lane 6&7 in Figure 2C) when Frg-1 and Im-p-Frg-2 are incubated in the presence  
197 of unactivated p-Frg-3. The third product, P3 is the expected tRNA minihelix, and this  
198 was confirmed by comparison to a standard prepared by conventional synthesis (Lane  
199 3 in Figure 2C). A fourth product (P4) lacking a FAM label (Figure S22) was also  
200 expected from the loop-closing ligation reaction of p-Frg-2 and Im-p-Frg-3 (or reaction  
201 from Im-p-Frg-2 and Im-p-Frg-3 followed by hydrolysis of the Frg-2  
202 phosphorimidazolide). Indeed, P4 was observed when Sybr-Gold staining was used to  
203 image the RNA gel (Figure S22) and was further verified by incubating Im-p-Frg-2 and  
204 Im-p-Frg-3 in the absence of FAM-Frg-1. These results demonstrate the power of the  
205 loop-closing ligation strategy in constructing RNA structures from short  
206 oligonucleotides. Three short RNA pieces alone were able to give four products,  
207 including the desired tRNA minihelix (P3) and two on-pathway intermediate products  
208 (P2 and P4). The formation of the off-target product (P1) in the full reaction (Figure  
209 2B, Lanes 1&2 in Figure 2C) indicates the surprising robustness of the loop-closing  
210 ligation even in the presence of the complement strand to the overhang sequence. In a  
211 prebiotic scenario, a pool of activated short random sequence oligonucleotides could  
212 therefore have given rise to longer RNAs with structural elements more complex than  
213 simple duplexes. However, although the formation of such structures is a prerequisite  
214 for RNA function, it is not a guarantee thereof and therefore we further tested loop-  
215 closing ligation with regard to the assembly of functional, structured RNAs.

216  
217 In proof of principle experiments, we targeted the well-studied hammerhead ribozyme  
218 first, the catalytic core of which includes a typical hairpin stem-loop (35). The full-  
219 length hammerhead ribozyme was retrosynthetically disconnected in the loop region,  
220 generating a 5'-half fragment (HH-5'-Frg) and a 3'-half fragment (p-HH-3'-Frg) (Figure  
221 3A). The HH-5'-Frg strand was labelled with a FAM fluorophore, and the p-HH-3'-Frg  
222 strand was converted into the phosphorimidazolide activated form (Im-p-HH-3'-Frg)  
223 before mixing with the HH-5'-Frag (each at 50  $\mu$ M). Under our standard loop-closing  
224 ligation conditions, a 12 % yield of the full-length hammerhead ribozyme (HH-Full)  
225 was observed after 10 hours (Figure 2B, and Figure S). We then diluted the loop-closing  
226 ligation mixture 500-fold, such that the final concentration of full-length ribozyme,  
227 HH-Full, was about 12 nM, into a solution containing 1  $\mu$ M of FAM-labelled  
228 hammerhead ribozyme substrate (HH-Sub). When we incubated the resulting mixture  
229 at 37  $^{\circ}$ C, the yield of the cleavage product (HH-Pdt) reached 5 % after 30 min and 16  
230 % after 90 min. As a control for the effect of loop closing ligation, a sample was  
231 prepared in which the HH-5'-Frag was mixed with unactivated p-HH-3'-Frg under the  
232 same conditions. In this control experiment we observed no visible substrate cleavage  
233 after a 90 min incubation. When the loop-closing reaction mixture was diluted by only  
234 125-fold, the yield of the cleavage product (HH-Pdt) reached 65 % after 90 min because  
235 of the higher concentration of the ligated ribozyme (about 48 nM). However, in this  
236 case the control experiment with a 125-fold dilution of unligated HH fragments (final  
237 concentration of each fragment 400 nM) did show some enzymatic activity with 10 %  
238 substrate cleavage after 90 min, consistent with previous observations that a functional  
239 hammerhead ribozyme can be partially reconstituted by noncovalent association of  
240 fragments at high concentrations (11-14). We also assembled a ligase ribozyme (36)  
241 using a single loop-closing ligation reaction, and efficient ribozyme activity was  
242 observed directly without product purification (Figure S22). These two cases clearly  
243 demonstrate the effectiveness of the loop-closing ligation in constructing functional,  
244 full-length ribozymes in a template-free manner.

245

## 246 Discussion

247 The well-known tRNA molecule has three hairpin substructures, and nearly 70 % of  
248 the nucleotides in the 16s RNA are involved in hairpins (28, 29). Our results suggest  
249 that hairpin loop structures could have originated directly by the loop-closing ligation  
250 of short RNA oligonucleotides. The conceptual switch from nicked duplex ligation to  
251 loop-closing ligation has two immediate consequences. Firstly, the need for external  
252 templates to join short oligonucleotides together into ribozymes is avoided (Figure 1-  
253 3), as all the strands involved become incorporated into the product by self-templating.  
254 This minimizes the problem of template oligonucleotides inhibiting product function.  
255 Secondly, the loop-closing concept makes RNA secondary structure the primary  
256 criterion to be deployed in retrosynthetic analysis of a functional RNA. This approach  
257 exploits the structural features of the target RNAs during the ligation process, thus  
258 decreases the reliance on efficient post-synthetic folding of the full length, single  
259 stranded RNA. We suggest that the shortcut of accessing RNA structures directly by  
260 loop-closing ligation could not only circumvented the template inhibition issue, but also  
261 have played key roles in the de novo emergence of structured RNAs at the origin of  
262 life. Notably, it has been demonstrated experimentally that compared to a fully random  
263 pool of RNAs, partially structured or compact, structured pools are superior sources of  
264 functional RNAs in *in vitro* selection experiments (37, 38). This further strengthens the  
265 potential advantage of having direct access to structured, single stranded RNAs for the  
266 emergence of function. RNA bulges and internal loops are also prevalent secondary  
267 structures (1, 5, 39-41), and we are currently exploring whether they too can be  
268 produced by ligation in unpaired regions of prestructured RNAs. Although we have not  
269 considered the origin of the initial pool of short oligonucleotides in this work, both  
270 untemplated synthesis and subsequent non-enzymatic templated processes could have  
271 contributed (6-8, 21).

272

273 Turning to specific results, the hammerhead ribozyme and a ligase ribozyme were  
274 successfully assembled from their fragments and demonstrated to be functional *in situ*  
275 after the loop-closing ligation. Although our data (Table 1, Figure S) suggests that the  
276 loop-closing ligation likely generated 2',5'-linkages (3',5'-linkages cannot be ruled out  
277 in constructs different from those in Table 1), the observation of efficient ribozyme  
278 activity (Figure 3 and Figure S22) suggested that 2',5'-linkages in the loop regions, if  
279 present, has no dramatic impact on these two ribozymes (31). The relatively low yields  
280 of loop closing ligation in our studies (~ 10 % observed yield on average) are due in  
281 part to the inefficiency of phosphoimidazolid activation, and in part to the competing  
282 hydrolysis reaction. We suggest that compatible, *in situ* activation chemistry that could  
283 maintain sets of oligonucleotides in an activated state (22,42-43) might drive these  
284 ligation reactions to better yields and potentially enable iterative loop-closing ligations.  
285 It is also possible that certain overhang sequences may result in higher yields of loop-  
286 closing ligation, as suggested by the varying yields in the small set of sequences  
287 examined in Table 1. The identification of such sequences will be important both for  
288 understanding the assembly of ribozymes from prebiotically available random  
289 sequence oligonucleotides, as well as for the design and assembly of ribozymes from  
290 an engineering point of view.

291 The non-covalent assembly of fragments into partly functional ensembles can now be  
292 seen as an evolutionary precursor of full-length ribozymes produced by loop-closing  
293 ligation of the fragments within such ensembles (11, 14, 44-45). We suggest that  
294 loosely structured assemblies of short oligonucleotides with diverse, but low-level

295 function would have been accessible via dynamic assembly/disassembly of short RNA  
296 oligonucleotides at equilibrium. These loosely structured assemblies could have been  
297 pulled out-of-equilibrium and trapped in more stable structures by loop-closing  
298 ligation, thus increasing their functional activity and rendering them more robust  
299 (Figure 3C). We suggest the straightforward and economical strategy of assembling  
300 RNA structures and functions by loop-closing ligation could have been a plausible  
301 mechanism for the emergence of functions before a robust process for the replication  
302 of long RNAs was available.

303

304

## 305 References

- 306 1. J. R. Wyatt, I. Jr. Tinoco, RNA structural elements and RNA function. In *the RNA*  
307 *World*, (ed. Gesteland, R. F., Atkins, J. F.), pp. 465–97. (Cold Spring Harbor Lab.  
308 Press, 1993).
- 309 2. J. A. Doudna, Tertiary motifs in RNA structure and folding. *Angew. Chem. Int. Ed.*  
310 **38**, 2326-2343 (1999).
- 311 3. E. A. Doherty, J. A. Doudna, Ribozyme structures and mechanisms. *Annu. Rev.*  
312 *Biophys. Biomol. Struct.*, **30**, 457–75 (2001).
- 313 4. R. T. Batey, R. P. Rambo, M. J. Fedor, J. R. Williamson, The catalytic diversity of  
314 RNAs. *Nat. Rev. Mol. Cell Biol.* **6**, 399-412 (2005).
- 315 5. S. E. Butcher, A. M. Pyle, The molecular interactions that stabilize RNA tertiary  
316 structure: RNA motifs, patterns, and networks. *Acc. Chem. Res.* **44**, 12, 1302–1311  
317 (2011).
- 318 6. J. P. Ferris, Montmorillonite-catalysed formation of RNA oligomers: the possible  
319 role of catalysis in the origins of life. *Phil. Trans. R. Soc. B*, **361**, 1777–1786 (2006)
- 320 7. L. E. Orgel, Molecular replication. *Nature* **358**, 203-209 (1992).
- 321 8. J. W. Szostak, The eightfold path to non-enzymatic RNA replication. *J. Syst. Chem.*  
322 **2012**, 3, 2 (2012)
- 323 9. F. Wachowius, P. Holliger, Non-enzymatic assembly of a minimized RNA  
324 polymerase ribozyme. *ChemSystemsChem.* **1**, No. e1900004 (2019).
- 325 10. L. Zhou, D. K. O’Flaherty, J. W. Szostak, Assembly of a ribozyme ligase from short  
326 oligomers by nonenzymatic ligation. *J. Am. Chem. Soc.* **142**, 15961–15965 (2020).
- 327 11. J. A. Doudna, S. Couture, J. W. Szostak, A multisubunit ribozyme that is a catalyst  
328 of and template for complementary strand RNA synthesis. *Science* **251**, 1605–1608  
329 (1991).
- 330 12. T. A. Rogers, G. E. Andrews, L. Jaeger, W. W. Grabow, Fluorescent monitoring of  
331 RNA assembly and processing using the split-spinach aptamer. *ACS Synth. Biol.* **4**,  
332 162–166 (2015).
- 333 13. A. Akoopie, U. F. Müller, Lower temperature optimum of a smaller, fragmented  
334 triphosphorylation ribozyme. *Phys. Chem. Chem. Phys.* **18**, 20118–20125 (2016).
- 335 14. K. F. Tjhung, M. N. Shokhirev, D. P. Horning, G. F. Joyce, An RNA polymerase  
336 ribozyme that synthesizes its own ancestor. *Proc. Natl. Acad. Sci. USA* **117**, 2906–  
337 2913 (2020).
- 338 15. R. Naylor, P. T. Gilham, Studies on some interactions and reactions of  
339 oligonucleotides in aqueous solution. *Biochemistry* **5**, 2722-2728 (1966).
- 340 16. F. Diederich, P. J. Stang, Eds., *Templated Organic Synthesis* Wiley-VCH,  
341 Weinheim, 2000.

- 342 17. D. Herschlag, RNA chaperones and the RNA folding problem. *J. Biol. Chem.* **270**,  
343 20871-20874 (1995).
- 344 18. L. Rajkowitsch, D. Chen, S. Stampfl, K. Semrad, C. Waldsich, O. Mayer, M. F.  
345 Jantsch, R. Konrat, U. Bläsi, R. Schroeder, RNA chaperones, RNA annealers and  
346 RNA helicases. *RNA Biol.* **4**, 118-30 (2007).
- 347 19. O.C. Uhlenbeck, Keeping RNA happy. *RNA* **1**, 4-6 (1995).
- 348 20. L.-F. Wu, M. Su, Z. Liu, S. Bjork, J. D. Sutherland, Interstrand aminoacyl-transfer  
349 in a tRNA acceptor stem mimic. *J. Am. Chem. Soc.* **143**, 11836-11842 (2021).
- 350 21. T. Walton, W. Zhang, L. Li, C. P. Tam, J. W. Szostak, The mechanism of  
351 nonenzymatic template copying with imidazole-activated nucleotides. *Angew.*  
352 *Chem. Int. Ed.* **58**, 10812-10819 (2019).
- 353 22. A. Mariani, D. A. Russell, T., Javelle, J. D. Sutherland, A light-releasable  
354 potentially prebiotic nucleotide activating agent. *J. Am. Chem. Soc.* **140**, 8657-8661  
355 (2016).
- 356 23. K. Tamura, P. Schimmel, Chiral-selective aminoacylation of an RNA minihelix.  
357 *Science* **305**, 1253 (2004).
- 358 24. E. V. Puglisi, J. D. Puglisi, J. R. Williamson, U. L. RajBhandary, NMR analysis of  
359 tRNA acceptor stem microhelices: Discriminator base affects tRNA conformation  
360 at the 3'-end. *Proc. Natl. Acad. Sci. USA* **91**, 11467-11471 (1994).
- 361 25. R. Rohatgi, D. P. Bartel, J. W. Szostak, Nonenzymatic, template-directed ligation  
362 of oligoribonucleotides is highly regioselective for the formation of 3'-5'  
363 phosphodiester bonds. *J. Am. Chem. Soc.* **118**, 3340-3344 (1996).
- 364 26. A. Kanavarioti, C. F. Bernasconi, D. L. Doodokyan, D. J. Alberas, Magnesium ion  
365 catalyzed phosphorus-nitrogen bond hydrolysis in imidazolide-activated  
366 nucleotides. Relevance to template-directed synthesis of polynucleotides *J. Am.*  
367 *Chem. Soc.* **111**, 18, 7247-7257 (1989).
- 368 27. G. Varani, Exceptionally stable nucleic acid hairpins. *Annu. Rev. Biophys. Biomol.*  
369 *Struct.* **24**, 379-404 (1995).
- 370 28. J. Wolters, The nature of preferred hairpin structures in 16S-like rRNA variable  
371 regions. *Nucleic Acids Res.* **20**, 1843-1850 (1992).
- 372 29. P. C. Bevilacqua, J. M. Blöse, Structures, kinetics, thermodynamics, and biological  
373 functions of RNA hairpins. *Annu. Rev. Phys. Chem.* **59**, 79-103 (2008).
- 374 30. P. Svoboda, A. Di Cara, Hairpin RNA: a secondary structure of primary  
375 importance. *Cell. Mol. Life Sci.* **63**, 901-918 (2006).
- 376 31. A. E. Engelhart, M. W. Powner, J. W. Szostak, functional RNAs exhibit tolerance  
377 for non-heritable 2',5' versus 3',5' backbone heterogeneity. *Nat. Chem.* **5**, 390-394  
378 (2013).
- 379 32. O. C. Uhlenbeck, Complementary oligonucleotide binding to transfer RNA. *J. Mol.*  
380 *Biol.* **65**, 25-41 (1972).
- 381 33. J. Popow, A. Scheiffer, J. Martinez, Diversity and roles of (t)RNA ligases. *Cell.*  
382 *Mol. Life Sci.* **69**, 2657-2670 (2012).
- 383 34. C. Francklyn, P. Schimmel, Aminoacylation of RNA minihelices with alanine. *Proc.*  
384 *Natl. Acad. Sci. USA* **337**, 478-481 (1989).
- 385 35. H. W., Pley, K. M. Flaherty, D. B. McKay, Three-dimensional structure of a  
386 hammerhead ribozyme. *Nature* **372**, 68-74 (1994).
- 387 36. M. P. Robertson, G. F. Joyce, Highly efficient self-replicating RNA enzymes.  
388 *Chem. Bio.* **21**, 238-245 (2014).
- 389 37. J. H. Davis, J. W. Szostak, Isolation of high-affinity GTP aptamers from partially  
390 structured RNA libraries. *Proc. Natl. Acad. Sci. USA* **99**, 11616-11621 (2002).
- 391 38. F. Chizzolini, L. F. M. Passalacqua, M. Oumais, A. Dingilian, J. W. Szostak, A.



- 392 Luptak, Large phenotypic enhancement of structured random RNA pools. *J. Am.*  
393 *Chem. Soc.* **142**, 1941-1951 (2020).
- 394 39. M. Chastain, I. Jr. Tinoco, Structural elements in RNA. *Prog. Nucleic Acid Res.*  
395 *Mol. Biol.* **41**, 131-177 (1991).
- 396 40. P. B. Moore, Structural motifs in RNA. *Annu. Rev. Biochem.* **68**, 287–300 (1999).
- 397 41. D. K. Hendrix, S. E. Brenner, S. R. Holbrook, RNA structural motifs: building  
398 blocks of a modular biomolecule. *Q. Rev. Biophys.* **38**, 221–243 (2005).
- 399 42. Z. Liu, L.-F. Wu, J. Xu, C. Bonfio, D. A. Russell, J. D. Sutherland, Harnessing  
400 chemical energy for the activation and joining of prebiotic building blocks. *Nat.*  
401 *Chem.* **12**, 1023-1028 (2020).
- 402 43. S. J. Zhang, D. Duzdevich, J. W. Szostak, Potentially prebiotic activation chemistry  
403 compatible with nonenzymatic RNA copying. *J. Am. Chem. Soc.* **142**, 14810-14813  
404 (2020).
- 405 44. A. Kanai, Disrupted tRNA genes and tRNA fragments: a perspective on tRNA gene  
406 evolution. *Life* **5**, 321-331 (2015).
- 407 45. M. W. Gray, V. Gopalan, Piece by piece: building a ribozyme. *J. Biol. Chem.* **295**,  
408 2313-2323 (2020).

409

410 **Acknowledgments:** Author contributions: Loop-closing ligation was conceptualized  
411 by LFW and JDS, and was established with the assistance of ZL (2',5' vs 3',5'-  
412 regioselectivity experiment), SJR (ITC experiment) and MS (part of the solid phase  
413 RNA synthesis) in the JDS group; the ribozyme work was designed by LFW and JWS,  
414 and was done in the JWS group; LFW, ZL, SJR, MS, JWS and JDS analyzed the data;  
415 LFW, JWS and JDS wrote the manuscript; the authors thank Dr. Lijun Zhou for her  
416 generous gift of the 5'-triphosphorylated RNA substrate for the ligase ribozyme, and  
417 Dr. Saurja DasGupta for his kind help with the ribozyme work. Funding: Medical  
418 Research Council (MC\_UP\_A024\_1009), the Simons Foundation (290362 to JDS and  
419 290363 to JWS) and National Science Foundation grant CHE-1607034 to JWS. JWS  
420 is an Investigator of the Howard Hughes Medical Institute. Competing interests: The  
421 authors declare no competing financial interests. Data and materials availability: All  
422 available data are included in the supplementary materials.

423

#### 424 **Supplementary Materials**

425 Materials and Methods

426 Figure S1 to S23

427 Tables S1 to S4

428

A) Two pathways for the assembly of functional RNAs

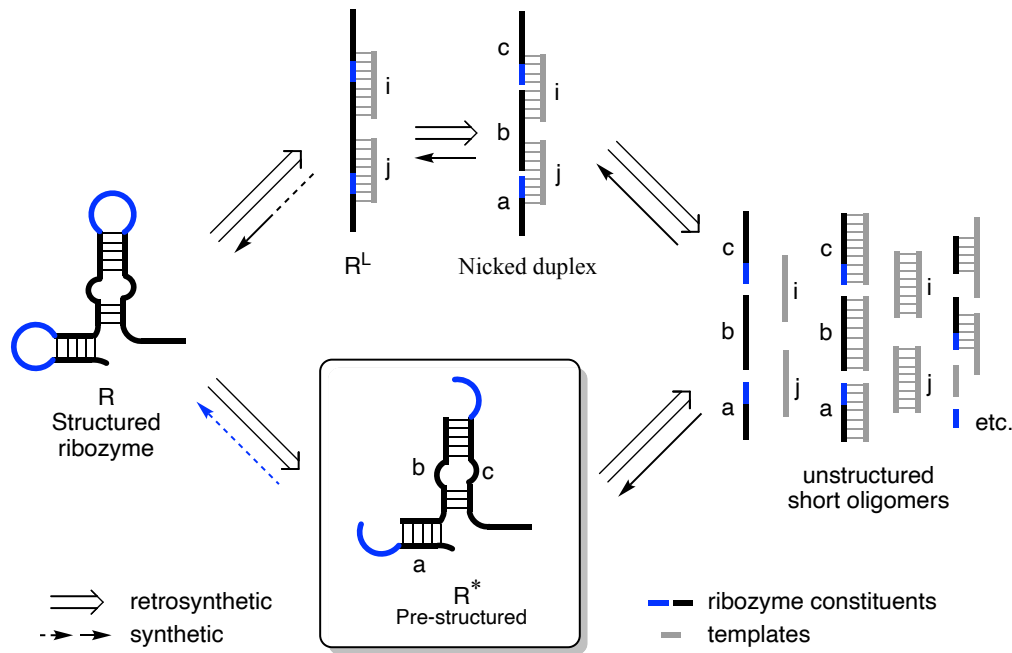

B) Assembly of an RNA hairpin by loop-closing ligation

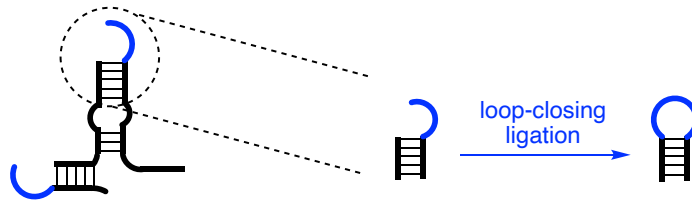

**Figure 1. Potential loop-closing ligation constructs stem-loop hairpin structure directly.** A) Conventional nicked duplex ligation strategy (top pathway) and the potential loop-closing ligation strategy (bottom pathway) to assemble full-length functional RNAs from short oligonucleotides. B) Loop-closing ligation could potentially enable a template-free way to assemble structured, functional RNAs.

5

10

**Table 1. Model reactions of loop-closing ligation: reaction efficiency depending on the overhang sequence length and sequence identity.**

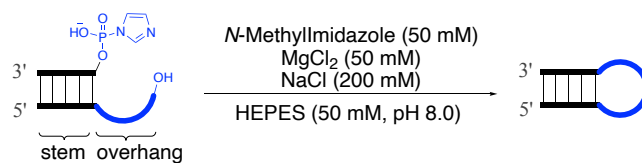

| Entry | Phosphate acceptor <sup>a</sup> |          | Corrected yield <sup>b</sup> | Reaction half-life <sup>c</sup> ( $T_{1/2}$ , h) |
|-------|---------------------------------|----------|------------------------------|--------------------------------------------------|
|       | Overhang                        | Stem     |                              |                                                  |
| 1     | UGCCA-3'                        | 5'-UCGCU | 30 %                         | 1.8                                              |
| 2     | CA-3'                           |          | 0 %                          | 1.4                                              |
| 3     | CCA-3'                          |          | 2 %                          | 1.4                                              |
| 4     | UCA-3'                          |          | 5 %                          | 1.5                                              |
| 5     | UCCA-3'                         |          | 15 %                         | 1.6                                              |
| 6     | ACCA-3'                         |          | 5 %                          | 1.5                                              |
| 7     | UGCCCA-3'                       |          | 13 %                         | 1.8                                              |
| 8     | UACCA-3'                        |          | 19 %                         | 1.7                                              |
| 9     | UCCCA-3'                        |          | 21 %                         | 1.5                                              |
| 10    | UUCCA-3'                        |          | 30 %                         | 2.0                                              |
| 11    | UGCCC-3'                        |          | 4 %                          | 1.4                                              |
| 12    | UGCCU-3'                        |          | 2 %                          | 1.4                                              |
| 13    | UGCCG-3'                        |          | 30 %                         | 1.3                                              |
| 14    | UGCCA(2'd)-3'                   |          | 2 %                          | 1.9                                              |
| 15    | UGCCA(3'd)-3'                   |          | 1 %                          | 1.6                                              |
| 16    | UGCCA-3'                        |          | 5'-UCGCC                     | 7 %                                              |

a) Phosphate donor sequence is Im-p-AGCGA. b) Corrected yield = Observed yield divided by the initial fraction of Im-p-AGCGA present in the pre-synthesized mixture of Im-p-AGCGA & p-AGCGA (for synthetic methods see the SI). c) Reaction half-life,  $t_{1/2}$ , is the combined rate of first-order consumption of Im-p-AGCGA resulting from both loop-closing ligation and competing hydrolysis. All yields and half-lives are average values from at least two independent experiments.

A) Retrosynthetic analysis of a tRNA minihelix

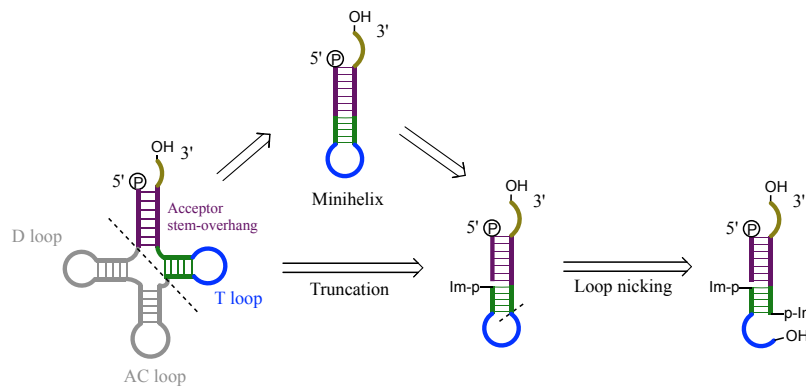

B) Non-enzymatic assembly of a minihelix structure

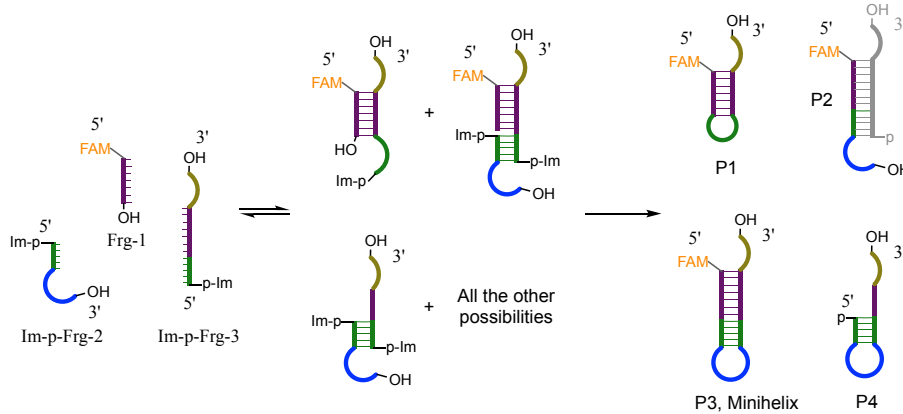

C) PAGE results of the assembly reactions

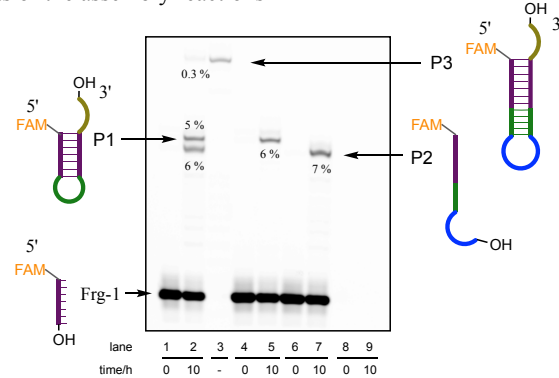

**Figure 2. Direct assembly a tRNA minihelix by loop-closing ligation.** A) The retrosynthetic truncation of tRNA and disconnection of the minihelix. B) Reaction scheme for the assembly of a tRNA minihelix. C) Representative PAGE analysis of the assembly reactions. Lane 1&2, assembly reaction of Frg-1, Im-p-Frg-2 and Im-p-Frg-3; Lane 3, authentic standard of the minihelix RNA; Lane 4&5, reaction of Frg-1 and Im-p-Frg-3; Lane 6&7, reaction of Frg-1, Im-p-Frg-2 and unactivated p-Frg-3; Lane 8&9, reaction of p-Frg-2 and Im-p-Frg-3 (no FAM-labelling oligos in this reaction). Yields are average values observed from duplicates.

A) Retrosynthetic analysis of the Hammerhead ribozyme

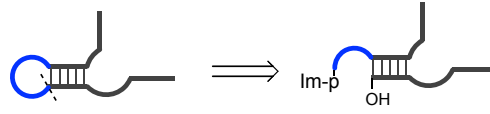

B) Assembly the Hammerhad ribozyme and the enzymatic assay

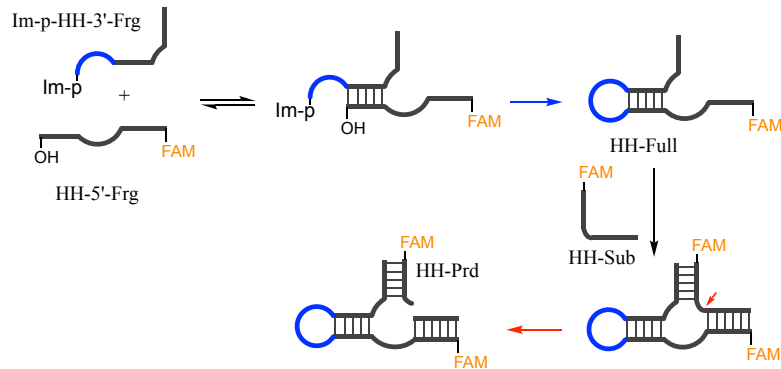

C) PAGE results of assembly and enzymatic assay reactions

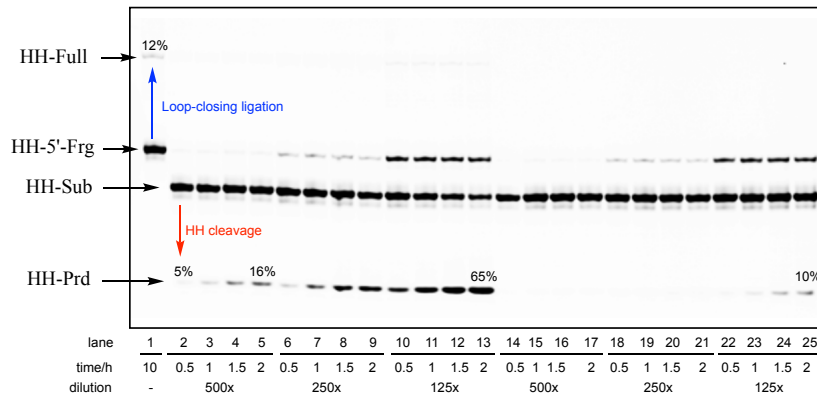

**Figure 3. Direct assembly of the hammerhead ribozyme by the loop-closing ligation.** A) The Hammerhead ribozyme was disconnected at the loop region retrosynthetically. B) Reaction scheme of the loop-closing ligation and the subsequent enzymatic cleavage of the Hammerhead substrate. C) Representative PAGE gel electrophoresis for the assembly reaction and the enzymatic assay. Lane 1, the loop-closing ligation after incubating Im-p-HH-3'-Frg (50  $\mu$ M) and HH-5'-Frg (50  $\mu$ M) together for 10 hours at 24  $^{\circ}$ C; Lanes 2-13, cleavage of HH-Sub by the reaction mixture after dilution; Lane 14-25, cleavage of the HH-sub by the non-covalently assembled but unligated HH fragments (without loop-closing ligation) after dilution. Yields are average values from duplicate reactions.

5

10

## Supporting information of

# Nonenzymatic loop-closing ligation generates RNA hairpins and is a template-free way to assemble functional RNAs

**Authors:** L.-F. Wu<sup>1,2</sup>, Z. Liu<sup>1</sup>, S. J. Roberts<sup>1</sup>, M. Su<sup>1</sup>, J. W. Szostak<sup>2\*</sup> and J. D. Sutherland<sup>1\*</sup>

<sup>1</sup>MRC Laboratory of Molecular Biology, Francis Crick Avenue, Cambridge Biomedical Campus, Cambridge, CB2 0QH, UK.

<sup>2</sup>Howard Hughes Medical Institute, Department of Molecular Biology, and Center for Computational and Integrative Biology, Massachusetts General Hospital, Boston, Massachusetts 02114, United States; Department of Genetics, Harvard Medical School, Boston, Massachusetts 02115, United States.

\*Correspondence to: [johns@mrc-lmb.cam.ac.uk](mailto:johns@mrc-lmb.cam.ac.uk), [szostak@molbio.mgh.harvard.edu](mailto:szostak@molbio.mgh.harvard.edu)

### Materials and Methods

Figure S1 to S23

Tables S1 to S4

## Materials and General

Reagents and solvents were obtained from *Acros Organics*, *Alfa Aesar*, *Santa Cruz Biotechnology*, *Sigma-Aldrich*, *SYNTHON Chemicals GmbH & Co. KG* and *VWR International*, and were used without further purification unless otherwise stated. For solid phase RNA synthesis, primer Support 5G for A, G, C, U or 2'-dA (with loading ~300  $\mu\text{mol/g}$ ) was purchased from GE Healthcare. 3'-dA-CPG (with loading 50  $\mu\text{mol/g}$ , item number 20-2004-01) was purchased from Glen Research. Phosphoramidites for RNA synthesis were purchased from Sigma-Aldrich or Link Technologies. RNA oligomers used in this study were synthesized using an ÄKTA™ oligopilot™ plus 10 (*GE Healthcare*) on a 5 to 50  $\mu\text{mol}$  scale or were synthesised using an Expedite 8909 on 1  $\mu\text{mol}$  scale. A *MettlerToledo* SevenEasy pH Meter S20 combined with a *ThermoFisher Scientific* Orion 8103BN Ross semi-micro pH electrode was used to measure and adjust the pH to the desired value. High-Pressure Liquid Chromatography (HPLC) was run on Dionex Ultimate 3000 (*Thermo Scientific*) using an Atlantis™ T3, 5  $\mu\text{m}$ , 4.6 x 250 mm column or an Atlantis™ T3, 3  $\mu\text{m}$ , 4.6 x 150 mm column. Polyacrylamide gel electrophoresis: 12 % polyacrylamide, 8 M urea gels (0.75 mm thick, 20 cm long) were run at 18 W in TBE buffer for 1 hours. FAM-labeled RNA oligomers were detected and imaged with an Amersham RGB Biomolecular Imager (*GE Healthcare Life Science*, Marlborough, MA) and quantified with the ImageQuant™ software package (*GE Healthcare Life Science*, Marlborough, MA). To image unlabeled RNA oligos, the RNA gel was stained using SYBR Gold Nucleic Acid Gel Stain (*Invitrogen*). Oligonucleotide concentrations were determined by UV absorbance at 260 nm using a NanoDrop® ND-1000 spectrophotometer.

## Methods

### Solid phase synthesis of RNA oligomers

After automated synthesis, RNAs were cleaved from the solid support by treating with 3 mL (for 5-50  $\mu\text{mol}$  scale synthesis, if 1  $\mu\text{mol}$  scale then 1.2 mL of mixture was used) of a 1:1 mixture of 28% wt  $\text{NH}_3/\text{H}_2\text{O}$  solution and 33% wt  $\text{CH}_3\text{NH}_2/\text{EtOH}$  solution at 55 °C for 30 minutes in a tube with a sealed cap. The solid was removed by filtration and washed with 50 %  $\text{EtOH}/\text{H}_2\text{O}$ . The solution and washings were combined and evaporated to dryness under reduced pressure. Silyl protecting groups were then removed by treating the residues with 3 mL (for 5-50  $\mu\text{mol}$  scale synthesis, if 1  $\mu\text{mol}$  scale then 0.25 mL of mixture was used) of 1:1 mixture of triethylamine trihydrofluoride and DMSO at 55°C for 90 minutes in a tube with a sealed cap. After brief cooling at -32 °C, 30 mL of cold 50 mM  $\text{NaClO}_4$  in acetone was added to the solution to precipitate the RNA product. The resulting mixture was centrifuged and the pellet of RNA was re-dissolved in 10 mL of water and passed through a *Waters Sep-Pack C18 Cartridge*, 5 g sorbent (Cartridge was pre-washed with 20 mL of MeOH then 100 mL of water before sample loading, then washed with 100 mL of  $\text{H}_2\text{O}$ , 20 mL of 10 % MeOH/ $\text{H}_2\text{O}$ , 25 mL of 20 % MeOH/ $\text{H}_2\text{O}$ , 25 mL of 50 % MeOH/ $\text{H}_2\text{O}$  and 20 mL of MeOH sequentially). Eluates containing RNA were combined and lyophilized. The resulting RNA was stored as a solid or dissolved in neutral pH solution at -32 °C for future usage.

### General procedure for chemical synthesis of Im-p-RNA

An aqueous reaction mixture (300  $\mu\text{L}$ ), containing the 5'-phosphoryl RNA (0.1 to 2 mM) and imidazole (50 mM), was titrated to pH 7. Then EDC (3 mg, final concentration 50 mM) was added, and the reaction mixture was incubated at room temperature. After 2 hours, 10 mL of cold 50 mM of  $\text{NaClO}_4$  in acetone were added to the reaction mixture to precipitate the RNA oligomers. The resulting cloudy mixture was shaken intensively and then placed in a -32 °C freezer for half an hour. The white pellet of product obtained by centrifugation was washed twice with 2 mL of cold 50 mM of  $\text{NaClO}_4$  in acetone, then dried in a desiccator under vacuum for half an hour. Finally, the white pellet was dissolved in 60-300  $\mu\text{L}$  (making combined concentration of RNA above 0.5 mM, including both 5'-p-RNA and 5'-Im-p-RNA) of 20 mM HEPES buffer with pH 8.0 and stored at -32 °C for future usage without purification. The combined concentration of 5'-Im-p-RNA and 5'-p-RNA was measured by UV absorbance at 260 nm



using NanoDrop. The yields of Im-p-RNA based on initial 5'-p-RNA ranged from 40 % to 80 % as measured by HPLC analysis.

#### **Standard procedure for loop-closing ligation (Table 1, Figure S2-S17, S19)**

A 50  $\mu$ L reaction mixture containing Im-p-AGCGA (50  $\mu$ M total, including both Im-p-AGCGA and p-AGCGA), phosphate acceptor RNA (50  $\mu$ M, 5'-UCGCUUGCCA-3'), *N*-methylimidazole (MeIm, 50 mM, added last to initiate the catalytic reaction), NaCl (200 mM), MgCl<sub>2</sub> (50 mM), cytosine (100  $\mu$ M, internal reference for HPLC analysis), in HEPES buffer (50 mM, pH 8.0) was incubated at 20 °C. Aliquots (8  $\mu$ L) were taken at specific time points and injected directly into an HPLC for analysis with 260 nm UV detection (Atlantis™ T3, 5  $\mu$ m, 4.6 x 250 mm column; flow rate 1 mL/min; LC solvents: A, 25 mM triethylammonium acetate, pH 7.5 in water and B, acetonitrile. Column compartment temperature was 25 °C). The observed yield of loop-closing ligation was calculated by comparing the above reaction to a parallel reaction run at pH 5.2 (MES buffer, 50 mM). At pH 5.2, no loop-closing ligation was observed and Im-p-AGCGA hydrolysed exclusively to p-AGCGA. Reactions with altered pH, temperature, concentration of *N*-MeIm, NaCl, MgCl<sub>2</sub> were analysed similarly.

Corrected yields of the loop-closing ligation: Loop-closing ligation yields were corrected on the basis of the measured amounts of Im-p-AGCGA and 5'-p-AGCGA in the starting samples. The corrected yields represent the partition of Im-p-AGCGA into loop-closing ligation product vs. hydrolysis under a certain condition. The corrected yield does not change as the percentage of Im-p-AGCGA varies between synthetic batches, but the observed yields do.

#### **Regioselectivity (2',5'- versus 3',5'-phosphodiester) of the loop-closing ligation in the model reactions (Figure S18)**

1  $\mu$ L of the above loop-closing ligation reaction was quenched with 40  $\mu$ L of stop buffer (6 M urea in TEB buffer with 100 mM EDTA, pH 8.0). An all- 3',5'-linkage authentic standard and an authentic standard with one 2',5'-linkage at the loop-closing position were prepared in stop buffer at 0.5  $\mu$ M. 2  $\mu$ L of the quenched and standard solutions, were analysed by PAGE. The regioselectivity of the newly formed phosphodiester bond was assigned by comparing the reactions to the standards by imaging after SYBR Gold Nucleic Acid Gel Staining.

### **Binding of the anticodon hairpin loop to its cognate codon (Figure S20)**

A 17-nt anticodon loop sequence 5'-GUCGCCUUCCA\*AGCGAC-3' (stem sequences are underlined, the anticodon is shown in bold, and the position where the loop was closed is indicated by a star) was used. A 5-nt sequence UGGAA containing the corresponding GGA codon was used as a surrogate messenger RNA. Prior to use, the RNAs were refolded by heating (10 min at 95 °C) and cooling to room temperature over 1.5 hours. ITC buffer: 50 mM MgCl<sub>2</sub>, 1M NaCl, 50 mM HEPES, pH 7.0. ITC measurements were performed at 10 °C using a GE Healthcare MicroCal Auto-ITC-200. The concentrations of the anticodon loop titrants in the injection syringe were 404 μM for the canonical 3',5'-linkage at A\*A position of the anticodon loop, or 363 μM for the anticodon loop with a 2',5'-linkage at the A\*A position, respectively. The concentration of the 5nt sequence (UGGAA) in the cell was 36.4 μM. Data collected for each titration experiment were then fit to a single binding site model.  $K_d$  values were determined to be 2.5 μM for the canonical anticodon loop with a 3',5'-linkage at the A\*A position, and 9.4 μM for the anticodon loop with a 2',5'-linkage at the A\*A position (see Figure S21 for detailed parameters). This gave a good fit for both the binding of anticodon loop with a 3',5' linkage ( $N=0.79$ ,  $K_d = 2.5 \mu\text{M}$ ,  $dH = -31.2 \text{ kcal/mol}$  and  $-TdS = 23.9 \text{ kcal/mol}$ ) and a 2',5' linkage ( $N=0.76$ ,  $K_d = 9.4 \mu\text{M}$ ,  $dH = -33.5 \text{ kcal/mol}$  and  $-TdS = 27.0 \text{ kcal/mol}$ ) to the 5nt oligonucleotide. Oligos used for ITC were purified by a Varian Prep Star preparative HPLC system with Varian Pro Star UV/vis detector and a Water Atlantis T3 Prep OBD 5 μM 19x250 mm column. Solvent A: 20 mM pH 7 NH<sub>4</sub>OAc; Solvent B: Acetonitrile. 0 min 7% B, 30 min 40% B, 35 min 90% B, 40 min 90% B. Fractions containing the product were lyophilised and then checked for purity by analytical HPLC.

### **Assembly of a tRNA minihelix structure by loop-closing ligation and nicked duplex ligation (Figure 1 and Figure S22)**

To a 10 μL reaction mixture containing 5'-FAM-AUUAGGAGAUG-3' (FAM-Frg-1, 25 μM), 5'-Im-p-GAGGGUUUGAGA-3' (Im-p-Frg-2, 25 μM in total, including 5'-Im-p-GAGGGUUUGAGA-3' and 5'-p-GAGGGUUUGAGA-3'), 5'-Im-p-CCCUUCAUCUCCACCA-3' (Im-p-Frg-3, 25 μM in total, including 5'-Im-p-CCCUUCAUCUCCACCA-3' and 5'-p-CCCUUCAUCUCCACCA-3'), NaCl (200

mM), MgCl<sub>2</sub> (50 mM) in HEPES buffer (50 mM, pH 8.0) was added *N*-methylimidazole (MeIm, 50 mM), followed by incubation at 25 °C. Aliquots (0.5 µL) were taken at specific time points and quenched in 25 µL of stop buffer (6 M urea in TBE buffer with 100 mM EDTA, pH 8.0). 2 µL of the quenched solution was analysed by PAGE. Observed yields were quantified according to the relative amounts of FAM-labelled oligomers by gel imaging. Products without FAM-labelling was visualised, but not quantified, after SYBR Gold Nucleic Acid Gel Staining.

### **Assembly the full-length hammerhead ribozyme by the loop-closing ligation and the subsequent enzymatic assay (Figure 2)**

A 10 µL reaction mixture containing 5'-FAM-ACCUGUCUGAUGAGCAAG-3' (HH-5'-Frg, 50 µM), 5'-Imp-UUAUCUUGCGAAACCGU-3' (Im-p-HH-3'-Frg, 50 µM, including 5'-Imp-UUAUCUUGCGAAACCGU-3' and 5'-p-UUAUCUUGCGAAA-CCGU-3'), *N*-methylimidazole (MeIm, 50 mM, added last to initiate the catalytic reaction), NaCl (200 mM), MgCl<sub>2</sub> (50 mM) in HEPES buffer (50 mM, pH 8.0) was incubated at 25 °C. A control reaction was run in parallel by replacing Im-p-HH-3'-Frg with unactivated p-HH-3'-Frg (5'-p-UUAUCUUGCGAAACCGU-3', 50 µM). After 10 hours, 0.5 µL of the reaction solution was diluted in 20 µL of water, then 1 µL of the diluted solution was quenched in 9 µL of stop solution (6 M urea in TEB buffer with 100 mM EDTA, pH 8.0). 2 µL of the quenched solution was analysed by PAGE. Observed yields of the full-length hammerhead ribozyme (HH-Full) were quantified according to the relative amounts of FAM-labelled oligomers by gel imaging.

**Enzymatic assay:** The loop-closing reaction mixture was diluted 50, 25, or 12.5 times, respectively, in water, and dilutions of the control reaction without loop-closing ligation were also prepared. Then, 1 µL of the previously diluted reaction mixtures were used to prepare 10 µL of a solution also containing 5'-FAM-AAACGGUCACAGGU-3' (HH-Sub, 1 µM), NaCl (200 mM), MgCl<sub>2</sub> (10 mM) and HEPES buffer (50 mM, pH 7.0). Each solution was incubated at 37 °C, and 1 µL of reaction mixture was quenched by adding to 9 µL of stop solution (6 M urea in TEB buffer with 100 mM EDTA, pH 8.0) at  $t = 0.5, 1, 1.5$  and 2 hours, respectively. 2 µL of the quenched solution was analysed by PAGE. Yields of cleavage of HH-Sub (5'-FAM-AAACGGUCACAGGU-3') to the 8-nt product (HH-Ptd, 5'-FAM-AAACGGUC>p) were quantified by gel imaging.

**Assembly a full-length Joyce ligase ribozyme by the loop-closing ligation and the subsequent enzymatic assay (Figure S23)**

A 10  $\mu\text{L}$  reaction mixture containing 5'-FAM-UAAAGUUGUUAUCACU-CGUAGUUCCA-3', (Lig-5'-Frg, 50  $\mu\text{M}$ ), 5'-Imp-CUACGUUAUGGAUGGGUU-GAAGUAU-3', (Im-p-Lig-3'-Frg, 50  $\mu\text{M}$ , including 5'-Imp-CUACGUUAUGGA-UGGGUUGAAGUAU-3' and 5'-p-CUACGUUAUGGAUGGGUUGAAGUAU-3'), *N*-methylimidazole (*N*-MeIm, 50 mM, added last to initiate the catalytic reaction), NaCl (200 mM), MgCl<sub>2</sub> (50 mM) in HEPES buffer (50 mM, pH 8.0) was incubated at 25 °C. A control reaction was run in parallel by replacing Im-p-Lig-3'-Frg with unactivated p-Lig-3'-Frg (5'-p-CUACGUUAUGGAUGGGUUGAAGUAU-3', 50  $\mu\text{M}$ ). After 10 hours, 0.5  $\mu\text{L}$  of the reaction solution was diluted in 20  $\mu\text{L}$  of water, then 1  $\mu\text{L}$  of the diluted solution was quenched in 9  $\mu\text{L}$  of stop solution (6 M urea in TEB buffer with 100 mM EDTA, pH 8.0). 2  $\mu\text{L}$  of the quenched solution was analysed by PAGE. Yields of the full-length ligase ribozyme (Lig-Full) were quantified by fluorescence gel imaging.

**Ligase ribozyme assay:** A 10  $\mu\text{L}$  enzymatic reaction mixture containing ppp-GAGACCGCAACUUA (Lig-Sub, 4  $\mu\text{M}$ ), NaCl (200 mM), MgCl<sub>2</sub> (50 mM), HEPES buffer (50 mM, pH 8.0) and  $\sim 0.8$   $\mu\text{M}$  of Lig-Full was prepared. The Lig-Full solution (2  $\mu\text{L}$ ) was added last. The same procedure was applied to the control reaction without loop-closing ligation. The resulting solutions were incubated at 48 °C for 6 hours, then 1  $\mu\text{L}$  of each reaction mixture was quenched by addition to 9  $\mu\text{L}$  of stop solution (6 M urea in TBE buffer (I don't think you have defined TBA buffer) with 100 mM EDTA, pH 8.0). 2  $\mu\text{L}$  of the quenched solution was analysed by PAGE. The yield of the enzymatic ligation product (Lig-Ptd) was quantified by gel imaging. Products without FAM-label were visualised, but not quantified, by SYBR Gold Nucleic Acid Gel Staining

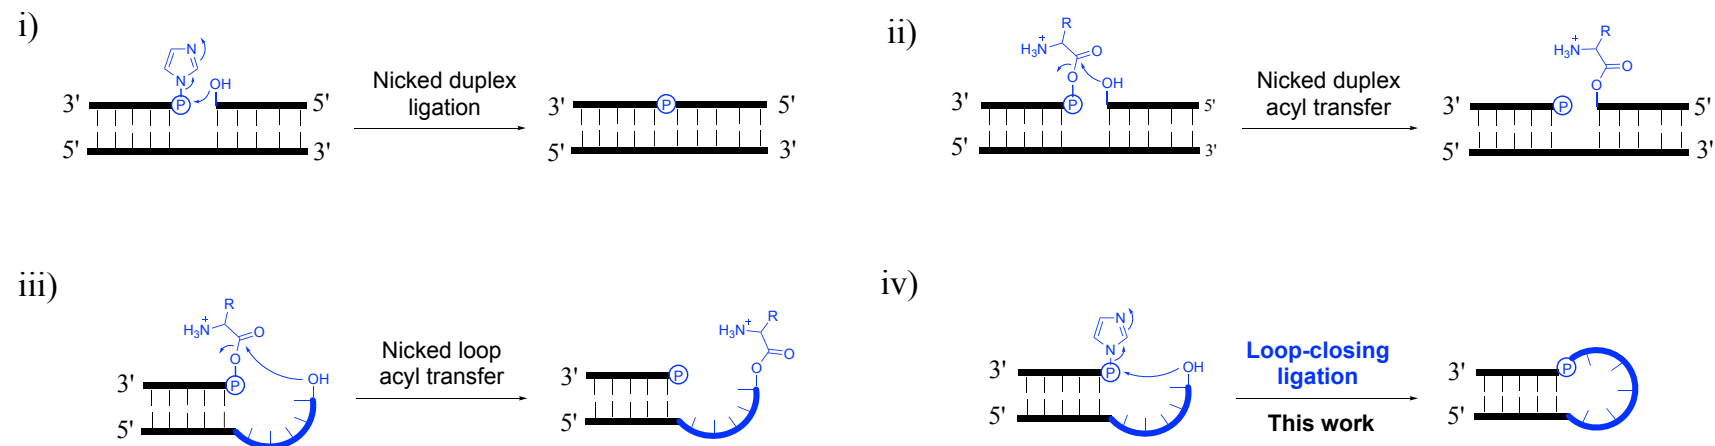

**Figure S1. Loop-closing ligation compared to ligation and acyl-transfer reactions on a nicked duplex and a nicked loop.** i) The proximity of 5'- and 3'-ends in a nicked duplex facilitates ligation using 5'-phosphorimidazolide activation, and also, ii) facilitates acyl transfer chemistry from a 5'-mixed anhydride. iii) Similarly, the proximity of 5'- and 3'-ends in a nicked loop facilitates acyl transfer chemistry from a 5'-mixed anhydride, which suggested that iv) the same proximity might facilitate ligation chemistry in a nicked loop using 5'-phosphorimidazolide activation.

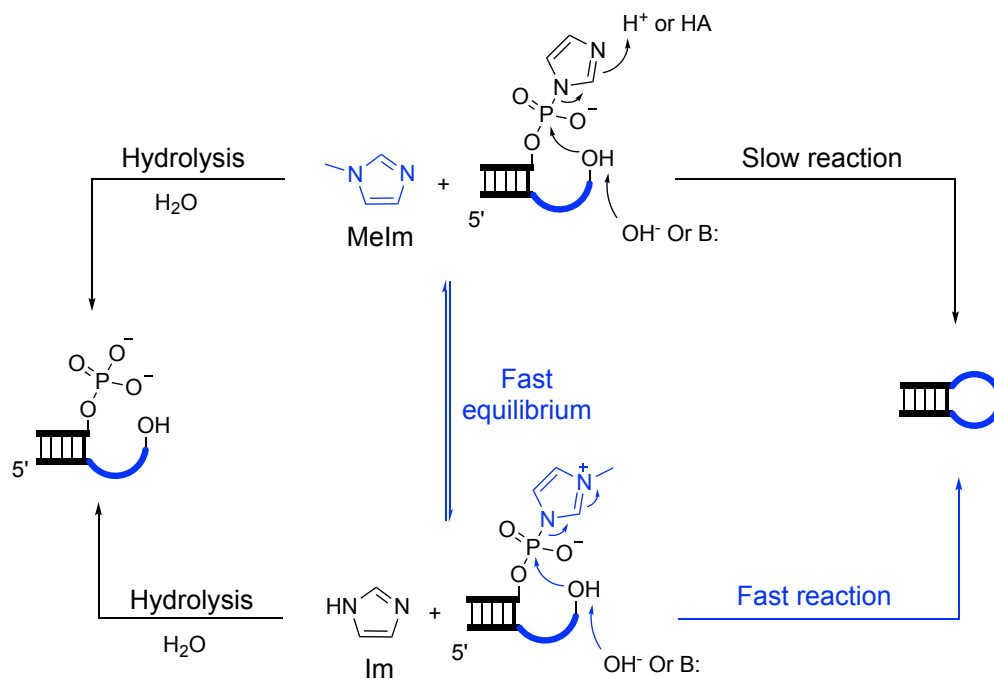

**Figure S2. Scheme for catalysis of loop-closing ligation by *N*-methylimidazole.** The equilibrium between Im-p-AGCGA + *N*-MeIm and *N*-MeIm-p-AGCGA + Im could also happen off-duplex, and all the other possible association and dissociation equilibria of RNA strands are omitted for simplicity. Standard reaction condition: 50  $\mu$ M each of the phosphate donor and phosphate acceptor RNA strands, *N*-MeIm 50 mM, MgCl<sub>2</sub>, 50 mM, NaCl 200 mM, HEPES 50 mM, pH 8.0 at 20 °C. Im, imidazole; *N*-MeIm, *N*-methylimidazole; B:, general base; HA, general acid. The overhang sequence is highlighted in blue.

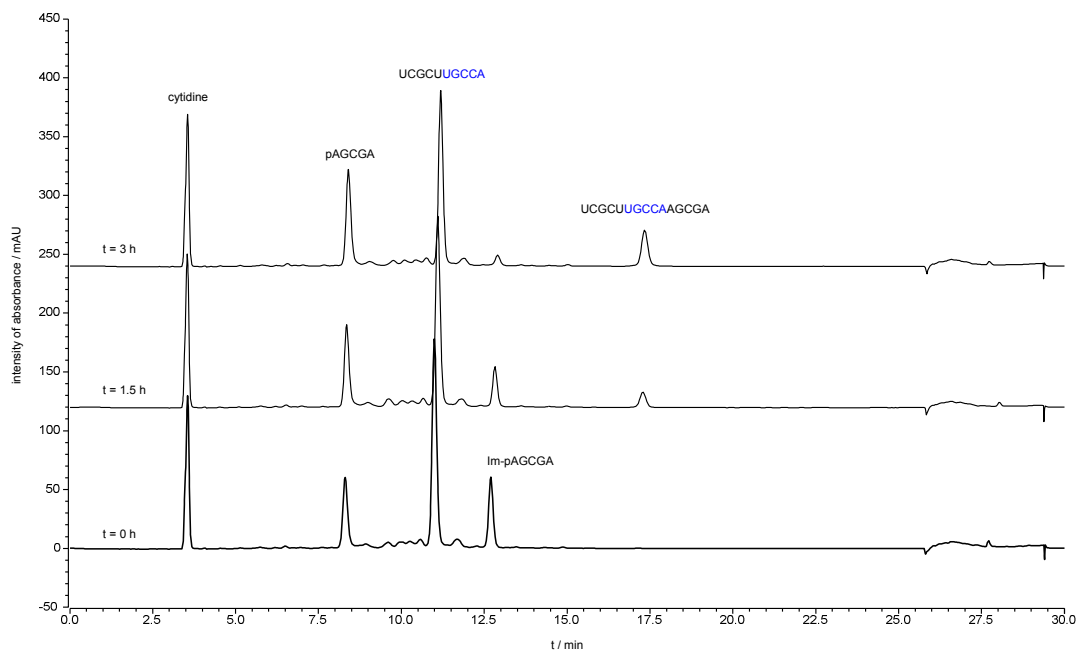

**Figure S3. Stacked HPLC traces of loop-closing ligation with UGCCA overhang.** Loop duplex sequence:

3' AGCGAp-Im

5' UGCCUUGCCA

Loop-closing ligation was monitored by HPLC with 260 nm UV detection. The solution was incubated at 20 °C and aliquots of 8  $\mu$ L were injected into an HPLC at different time points. Peaks for the phosphate donor, phosphate acceptor strands and the product of loop-closing ligation are indicated. Conditions: 50  $\mu$ L of reaction mixture, containing the phosphate donor strand (including Im-p-AGCGA and p-AGCGA, in total 50  $\mu$ M), the phosphate acceptor strand (5'-UGCCUUGCCA-3', 50  $\mu$ M), cytidine (internal standard, 200  $\mu$ M), NaCl (200 mM), MgCl<sub>2</sub> (50 mM), *N*-MeIm (50 mM) and HEPES (50 mM, pH 8), was incubated at 20 °C.

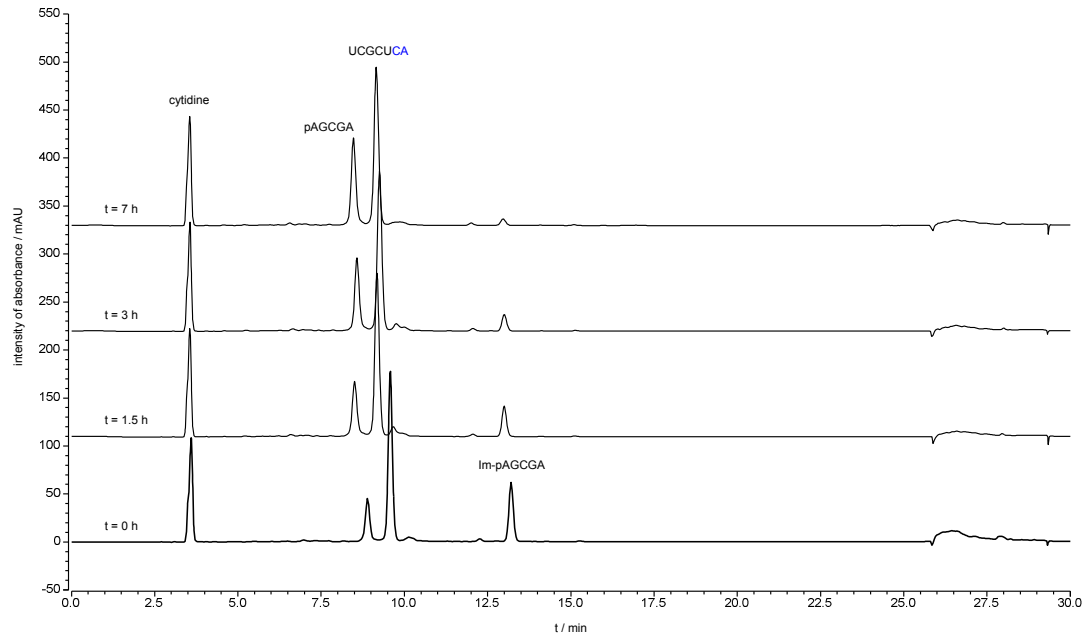

**Figure S4. Stacked HPLC traces of loop-closing ligation with CA overhang.** Loop duplex sequence:

3' AGCGAp-Im

5' UCGCUCA

Loop-closing ligation was monitored by HPLC with 260 nm UV detection. The solution was incubated at 20 °C and aliquots of 8  $\mu$ L were injected into an HPLC at different time points. Peaks for the phosphate donor, phosphate acceptor strands and the product of loop-closing ligation are indicated. Conditions: 50  $\mu$ L of reaction mixture, containing the phosphate donor strand (including Im-p-AGCGA and p-AGCGA, in total 50  $\mu$ M), the phosphate acceptor strand (5'-UCGCUCA-3', 50  $\mu$ M), cytidine (internal standard, 200  $\mu$ M), NaCl (200 mM), MgCl<sub>2</sub> (50 mM), *N*-MeIm (50 mM) and HEPES (50 mM, pH 8), was incubated at 20 °C.



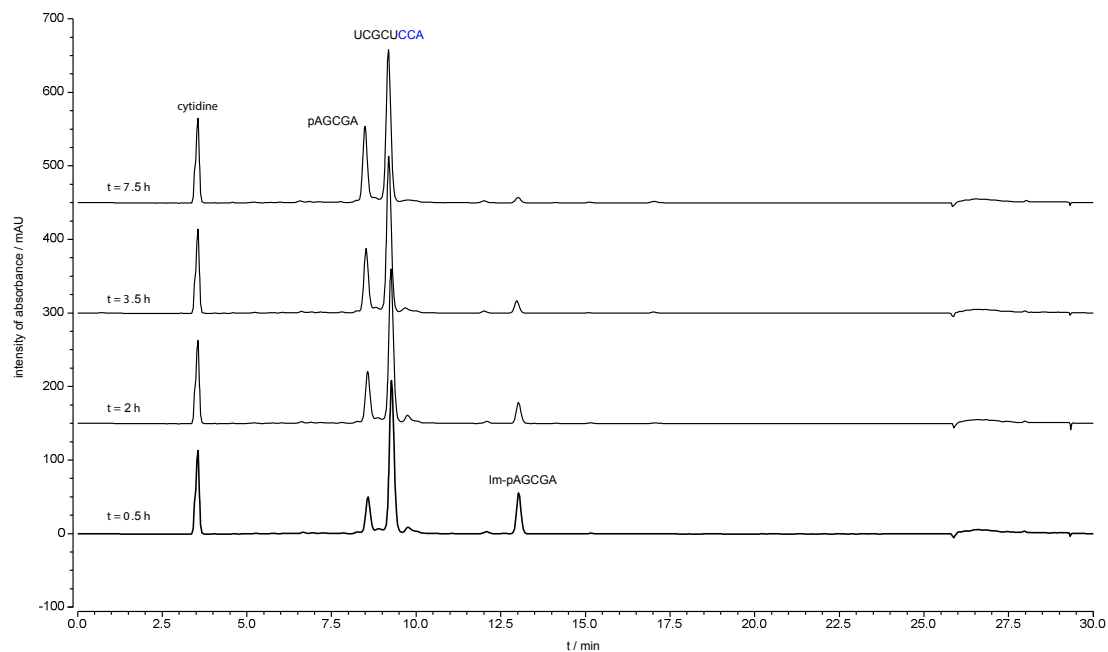

**Figure S5. Stacked HPLC traces of loop-closing ligation with CCA overhang.** Loop duplex sequence:

3' AGCGAp-Im

5' UCGCUCCA

Loop-closing ligation was monitored by HPLC with 260 nm UV detection. The solution was incubated at 20 °C and aliquots of 8  $\mu$ L were injected into an HPLC at different time points. Peaks for the phosphate donor, phosphate acceptor strands and the product of loop-closing ligation are indicated. Conditions: 50  $\mu$ L of reaction mixture, containing the phosphate donor strand (including Im-p-AGCGA and p-AGCGA, in total 50  $\mu$ M), the phosphate acceptor strand (5'-UCGCUCCA-3', 50  $\mu$ M), cytidine (internal standard, 200  $\mu$ M), NaCl (200 mM), MgCl<sub>2</sub> (50 mM), *N*-MeIm (50 mM) and HEPES (50 mM, pH 8), was incubated at 20 °C.

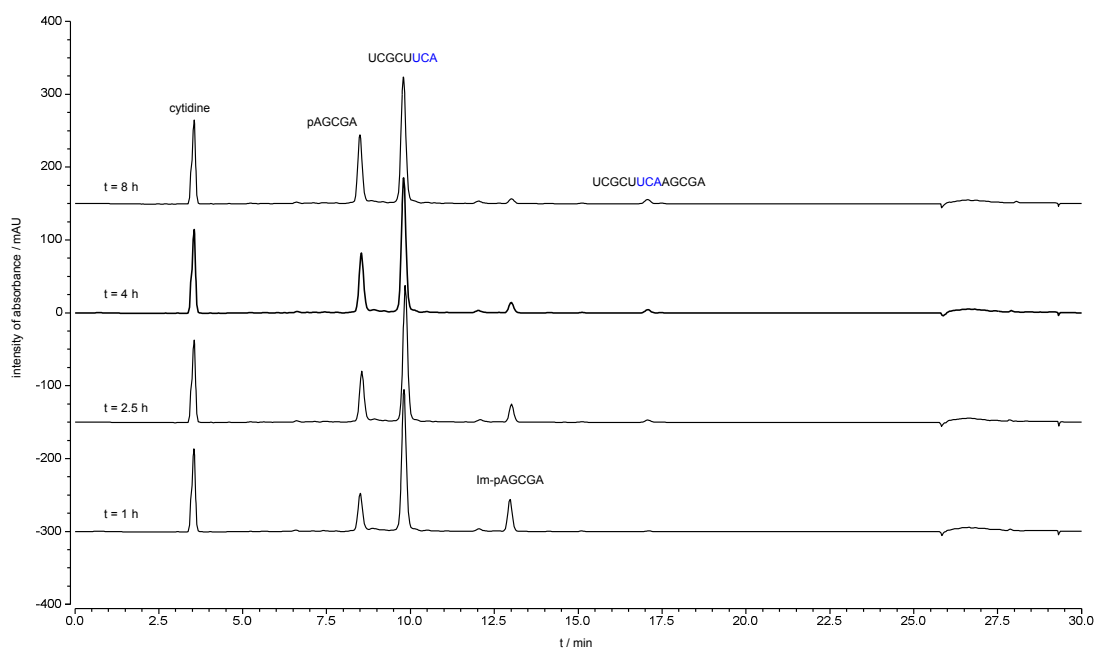

**Figure S6. Stacked HPLC traces of loop-closing ligation with UCA overhang.** Loop duplex sequence:

3' AGCGAp-Im

5' UCGCUUCA

Loop-closing ligation was monitored by HPLC with 260 nm UV detection. The solution was incubated at 20 °C and aliquots of 8  $\mu$ L were injected into an HPLC at different time points. Peaks for the phosphate donor, phosphate acceptor strands and the product of loop-closing ligation are indicated. Conditions: 50  $\mu$ L of reaction mixture, containing the phosphate donor strand (including Im-p-AGCGA and p-AGCGA, in total 50  $\mu$ M), the phosphate acceptor strand (5'-UCGCUUCA-3', 50  $\mu$ M), cytidine (internal standard, 200  $\mu$ M), NaCl (200 mM), MgCl<sub>2</sub> (50 mM), *N*-MeIm (50 mM) and HEPES (50 mM, pH 8), was incubated at 20 °C.

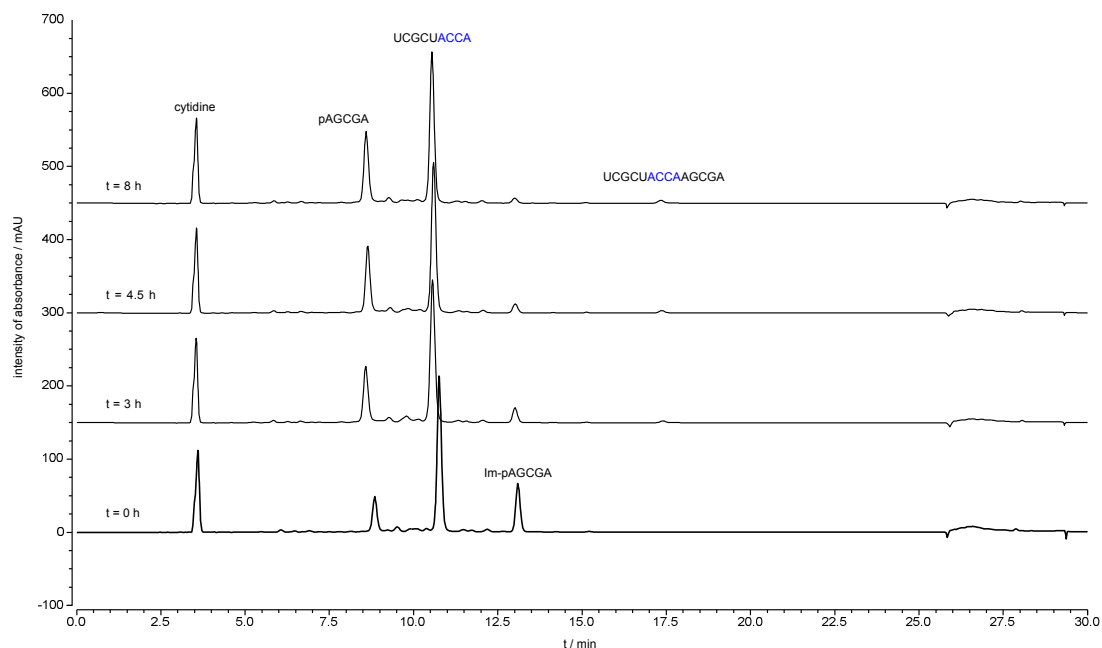

**Figure S7. Stacked HPLC traces of loop-closing ligation with ACCA overhang.** Loop duplex sequence:

3' AGCGAp-Im

5' UCGCUACCA

Loop-closing ligation was monitored by HPLC with 260 nm UV detection. The solution was incubated at 20 °C and aliquots of 8  $\mu$ L were injected into an HPLC at different time points. Peaks for the phosphate donor, phosphate acceptor strands and the product of loop-closing ligation are indicated. Conditions: 50  $\mu$ L of reaction mixture, containing the phosphate donor strand (including Im-p-AGCGA and p-AGCGA, in total 50  $\mu$ M), the phosphate acceptor strand (5'-UCGCUACCA-3', 50  $\mu$ M), cytidine (internal standard, 200  $\mu$ M), NaCl (200 mM), MgCl<sub>2</sub> (50 mM), *N*-MeIm (50 mM) and HEPES (50 mM, pH 8), was incubated at 20 °C.

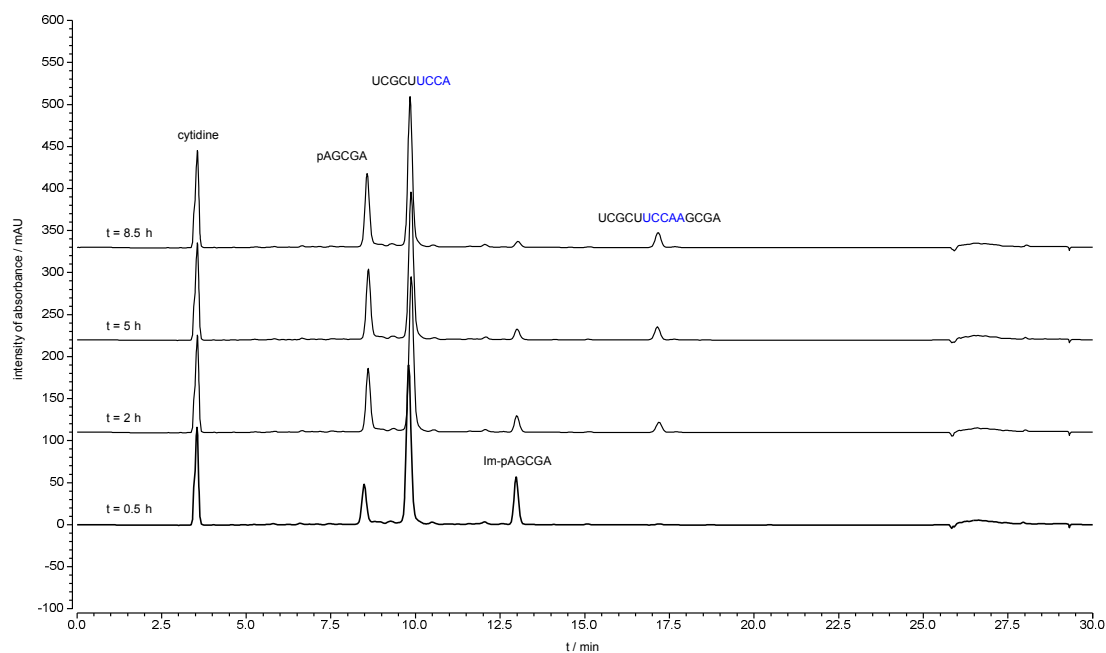

**Figure S8. Stacked HPLC traces of loop-closing ligation with UCCA overhang.** Loop duplex sequence:

3' AGCGAp-Im

5' UCGCUUCCA

Loop-closing ligation was monitored by HPLC with 260 nm UV detection. The solution was incubated at 20 °C and aliquots of 8  $\mu$ L were injected into an HPLC at different time points. Peaks for the phosphate donor, phosphate acceptor strands and the product of loop-closing ligation are indicated. Conditions: 50  $\mu$ L of reaction mixture, containing the phosphate donor strand (including Im-p-AGCGA and p-AGCGA, in total 50  $\mu$ M), the phosphate acceptor strand (5'-UCGCUUCCA-3', 50  $\mu$ M), cytidine (internal standard, 200  $\mu$ M), NaCl (200 mM), MgCl<sub>2</sub> (50 mM), *N*-MeIm (50 mM) and HEPES (50 mM, pH 8), was incubated at 20 °C.

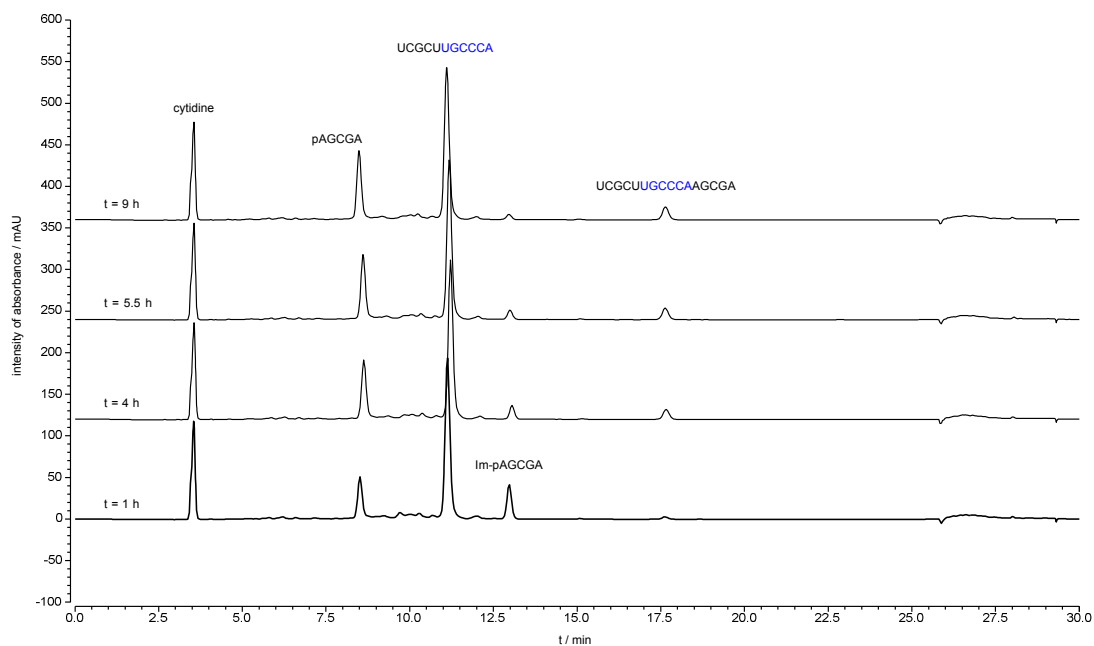

**Figure S9. Stacked HPLC traces of loop-closing ligation with UGCCA overhang.** Loop duplex sequence:

3' AGCGAp-Im

5' UGCUUGCCCA

Loop-closing ligation was monitored by HPLC with 260 nm UV detection. The solution was incubated at 20 °C and aliquots of 8  $\mu$ L were injected into an HPLC at different time points. Peaks for the phosphate donor, phosphate acceptor strands and the product of loop-closing ligation are indicated. Conditions: 50  $\mu$ L of reaction mixture, containing the phosphate donor strand (including Im-p-AGCGA and p-AGCGA, in total 50  $\mu$ M), the phosphate acceptor strand (5'-UGCUUGCCCA-3', 50  $\mu$ M), cytidine (internal standard, 200  $\mu$ M), NaCl (200 mM), MgCl<sub>2</sub> (50 mM), *N*-MeIm (50 mM) and HEPES (50 mM, pH 8), was incubated at 20 °C.

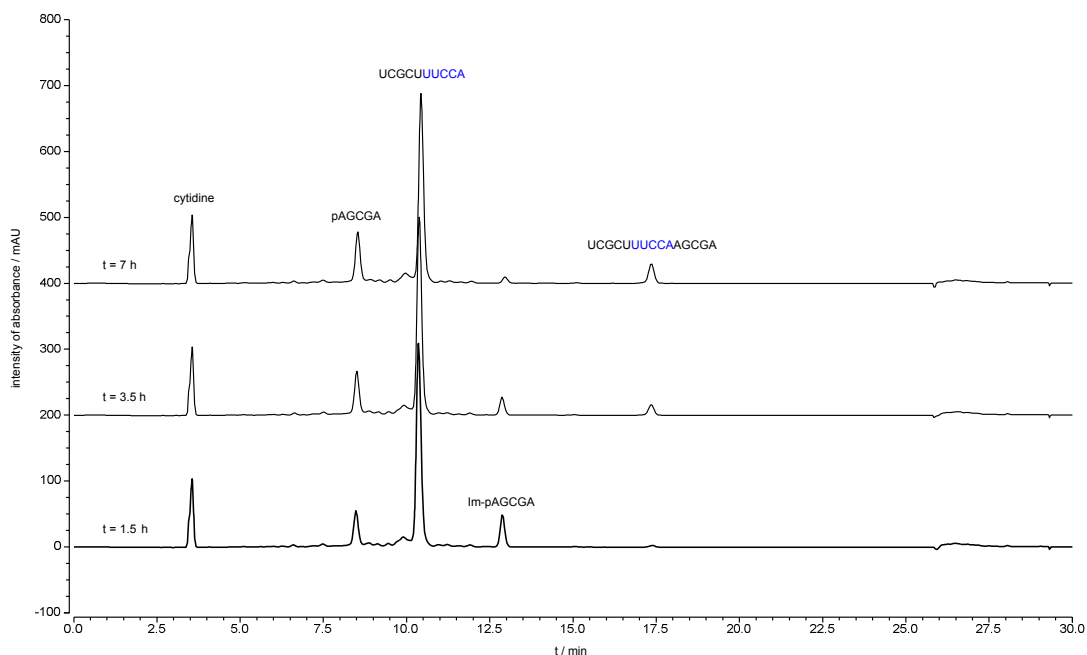

**Figure S10. Stacked HPLC traces of loop-closing ligation with UUCCA overhang.** Loop duplex sequence:

3' AGCGAp-Im

5' UGCUUUCCA

Loop-closing ligation was monitored by HPLC with 260 nm UV detection. The solution was incubated at 20 °C and aliquots of 8  $\mu$ L were injected into an HPLC at different time points. Peaks for the phosphate donor, phosphate acceptor strands and the product of loop-closing ligation are indicated. Conditions: 50  $\mu$ L of reaction mixture, containing the phosphate donor strand (including Im-p-AGCGA and p-AGCGA, in total 50  $\mu$ M), the phosphate acceptor strand (5'-UGCUUUCCA-3', 50  $\mu$ M), cytidine (internal standard, 200  $\mu$ M), NaCl (200 mM), MgCl<sub>2</sub> (50 mM), *N*-MeIm (50 mM) and HEPES (50 mM, pH 8), was incubated at 20 °C.

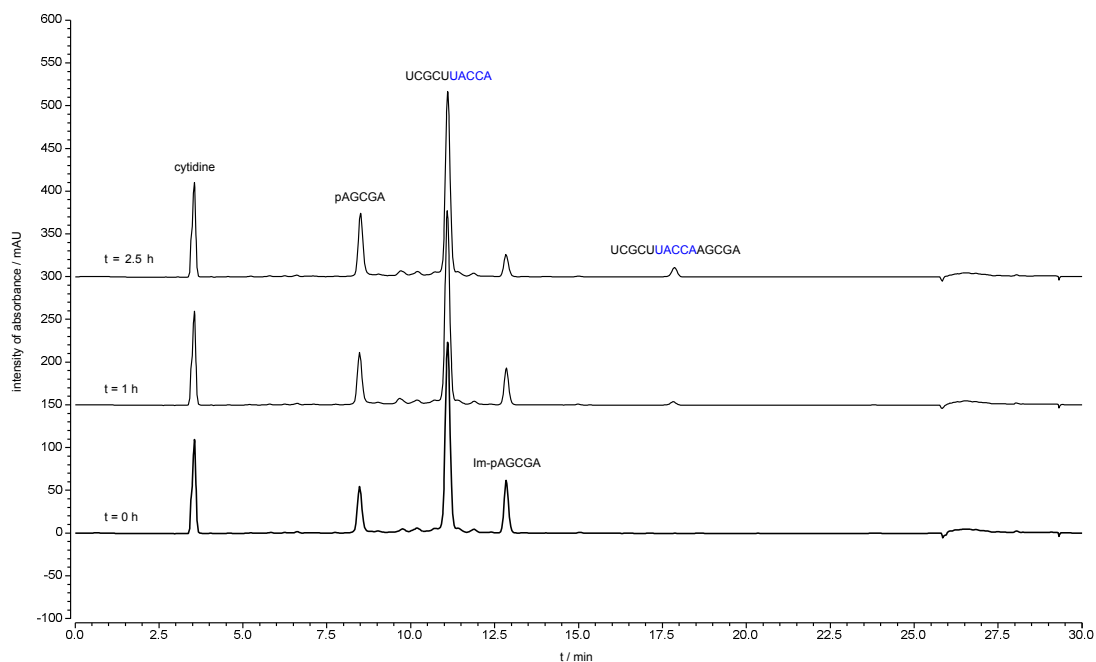

**Figure S11. Stacked HPLC traces of loop-closing ligation with UACCA overhang.** Loop duplex sequence:

3' AGCGAp-Im

5' UCGCUUACCA

Loop-closing ligation was monitored by HPLC with 260 nm UV detection. The solution was incubated at 20 °C and aliquots of 8  $\mu$ L were injected into an HPLC at different time points. Peaks for the phosphate donor, phosphate acceptor strands and the product of loop-closing ligation are indicated. Conditions: 50  $\mu$ L of reaction mixture, containing the phosphate donor strand (including Im-p-AGCGA and p-AGCGA, in total 50  $\mu$ M), the phosphate acceptor strand (5'-UCGCUUACCA-3', 50  $\mu$ M), cytidine (internal standard, 200  $\mu$ M), NaCl (200 mM), MgCl<sub>2</sub> (50 mM), *N*-MeIm (50 mM) and HEPES (50 mM, pH 8), was incubated at 20 °C.

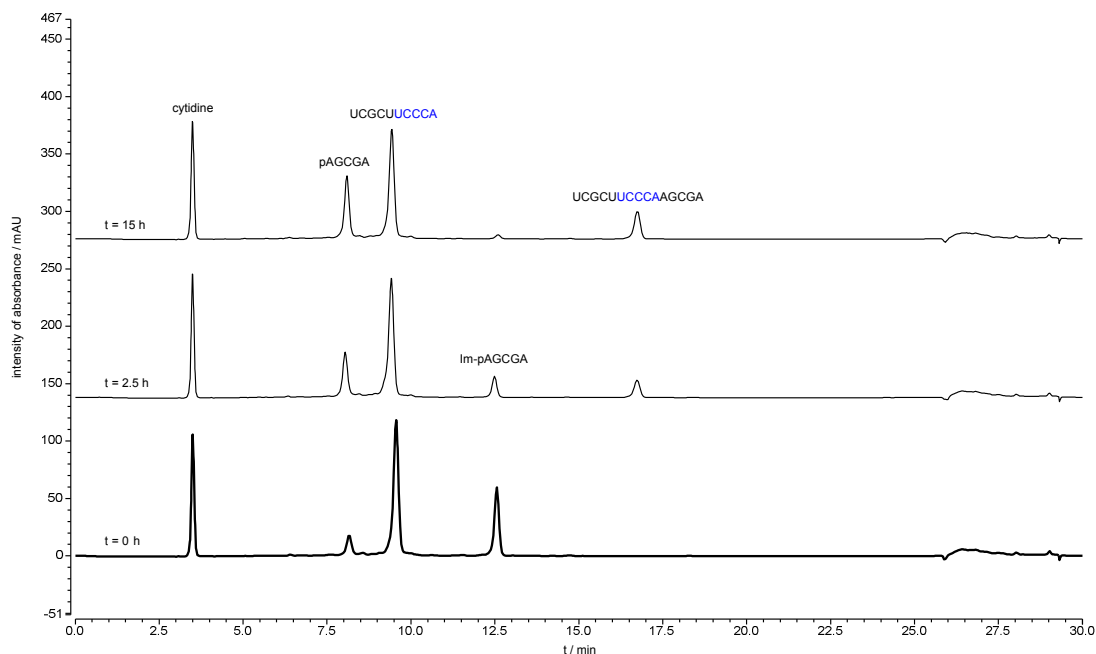

**Figure S12. Stacked HPLC traces of loop-closing ligation with UCCCA overhang.** Loop duplex sequence:

3' AGCGAp-Im

5' UCGCUUCCCA

Loop-closing ligation was monitored by HPLC with 260 nm UV detection. The solution was incubated at 20 °C and aliquots of 8  $\mu$ L were injected into an HPLC at different time points. Peaks for the phosphate donor, phosphate acceptor strands and the product of loop-closing ligation are indicated. Conditions: 50  $\mu$ L of reaction mixture, containing the phosphate donor strand (including Im-p-AGCGA and p-AGCGA, in total 50  $\mu$ M), the phosphate acceptor strand (5'-UCGCUUCCCA-3', 50  $\mu$ M), cytidine (internal standard, 200  $\mu$ M), NaCl (200 mM), MgCl<sub>2</sub> (50 mM), *N*-MeIm (50 mM) and HEPES (50 mM, pH 8), was incubated at 20 °C.



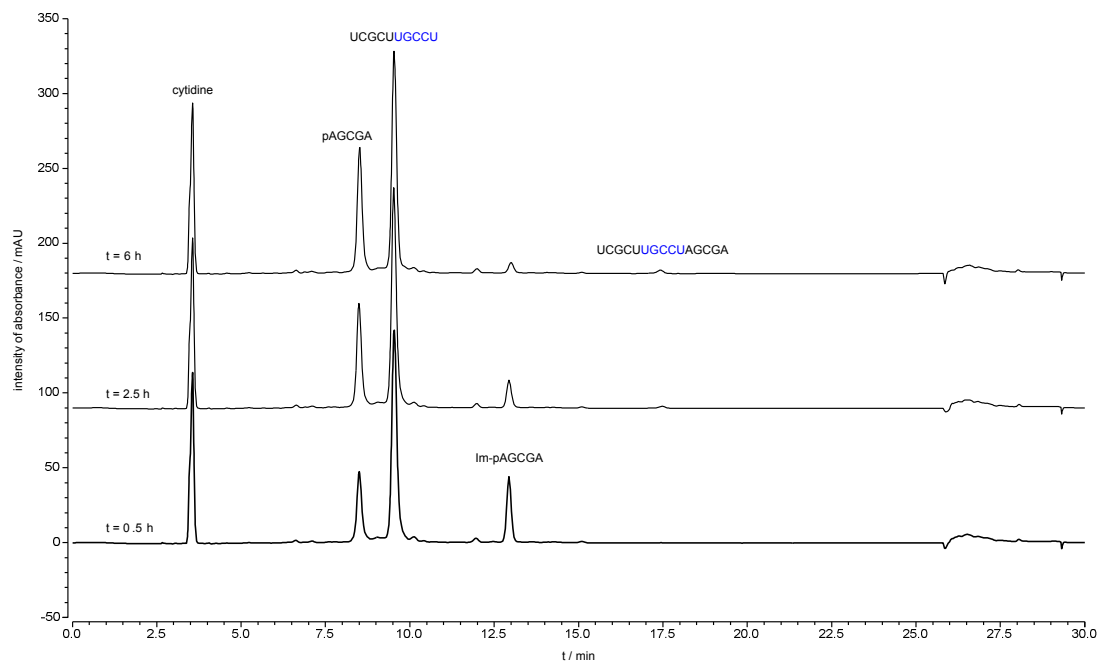

**Figure S13. Stacked HPLC traces of loop-closing ligation with UGCCU overhang.** Loop duplex sequence:

3' AGCGAp-Im

5' UGCCUUGCCU

Loop-closing ligation was monitored by HPLC with 260 nm UV detection. The solution was incubated at 20 °C and aliquots of 8  $\mu$ L were injected into an HPLC at different time points. Peaks for the phosphate donor, phosphate acceptor strands and the product of loop-closing ligation are indicated. Conditions: 50  $\mu$ L of reaction mixture, containing the phosphate donor strand (including Im-p-AGCGA and p-AGCGA, in total 50  $\mu$ M), the phosphate acceptor strand (5'-UGCCUUGCCU-3', 50  $\mu$ M), cytidine (internal standard, 200  $\mu$ M), NaCl (200 mM), MgCl<sub>2</sub> (50 mM), *N*-MeIm (50 mM) and HEPES (50 mM, pH 8), was incubated at 20 °C.

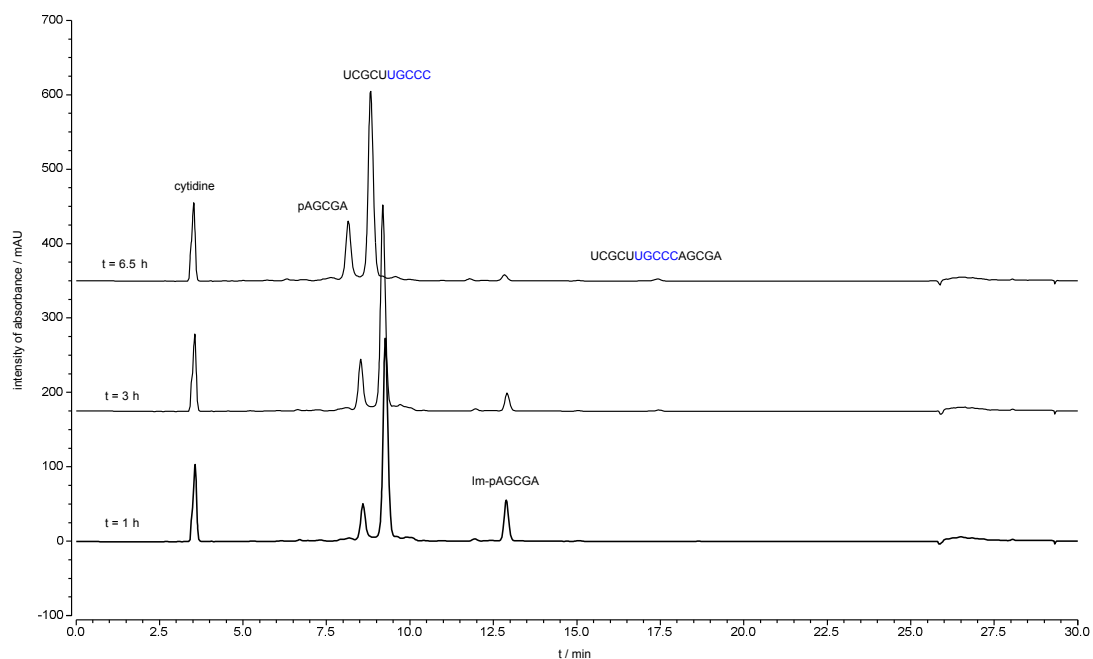

**Figure S14. Stacked HPLC traces of loop-closing ligation with UGCCC overhang.** Loop duplex sequence:

3' AGCGAp-Im

5' UGCUUGCCC

Loop-closing ligation was monitored by HPLC with 260 nm UV detection. The solution was incubated at 20 °C and aliquots of 8  $\mu$ L were injected into an HPLC at different time points. Peaks for the phosphate donor, phosphate acceptor strands and the product of loop-closing ligation are indicated. Conditions: 50  $\mu$ L of reaction mixture, containing the phosphate donor strand (including Im-p-AGCGA and p-AGCGA, in total 50  $\mu$ M), the phosphate acceptor strand (5'-UCGCUUGCCC-3', 50  $\mu$ M), cytidine (internal standard, 200  $\mu$ M), NaCl (200 mM), MgCl<sub>2</sub> (50 mM), *N*-MeIm (50 mM) and HEPES (50 mM, pH 8), was incubated at 20 °C.

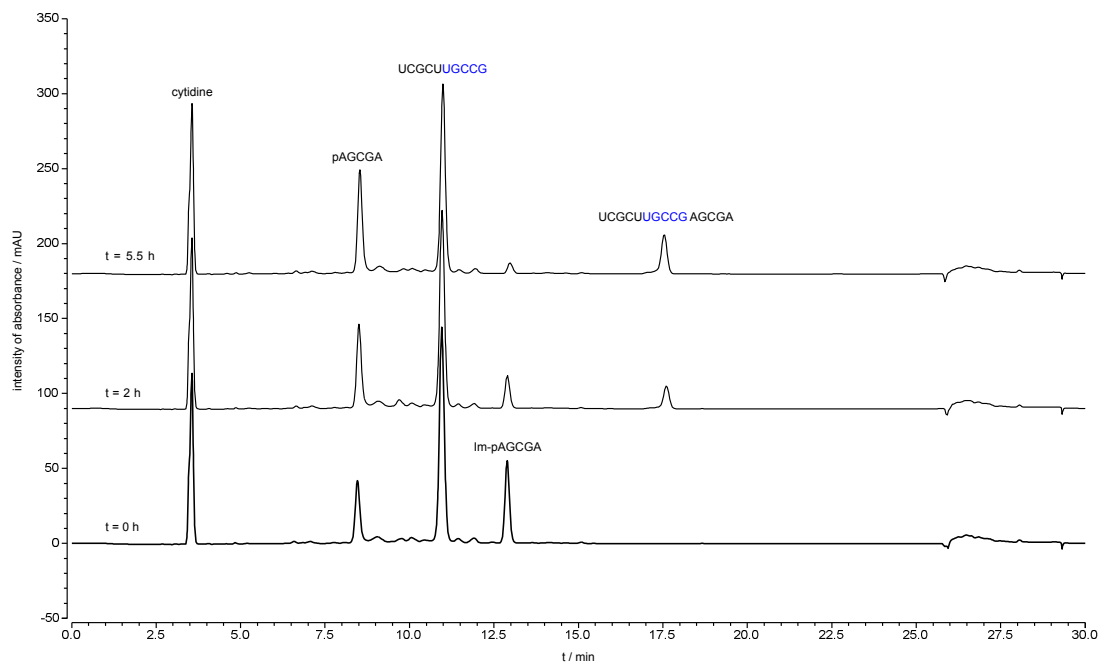

**Figure S15. Stacked HPLC traces of loop-closing ligation with UGCCG overhang.** Loop duplex sequence:

3' AGCGAp-Im

5' UCGCUUGCCG

Loop-closing ligation was monitored by HPLC with 260 nm UV detection. The solution was incubated at 20 °C and aliquots of 8  $\mu$ L were injected into an HPLC at different time points. Peaks for the phosphate donor, phosphate acceptor strands and the product of loop-closing ligation are indicated. Conditions: 50  $\mu$ L of reaction mixture, containing the phosphate donor strand (including Im-p-AGCGA and p-AGCGA, in total 50  $\mu$ M), the phosphate acceptor strand (5'-UCGCUUGCCG-3', 50  $\mu$ M), cytidine (internal standard, 200  $\mu$ M), NaCl (200 mM), MgCl<sub>2</sub> (50 mM), *N*-MeIm (50 mM) and HEPES (50 mM, pH 8), was incubated at 20 °C.

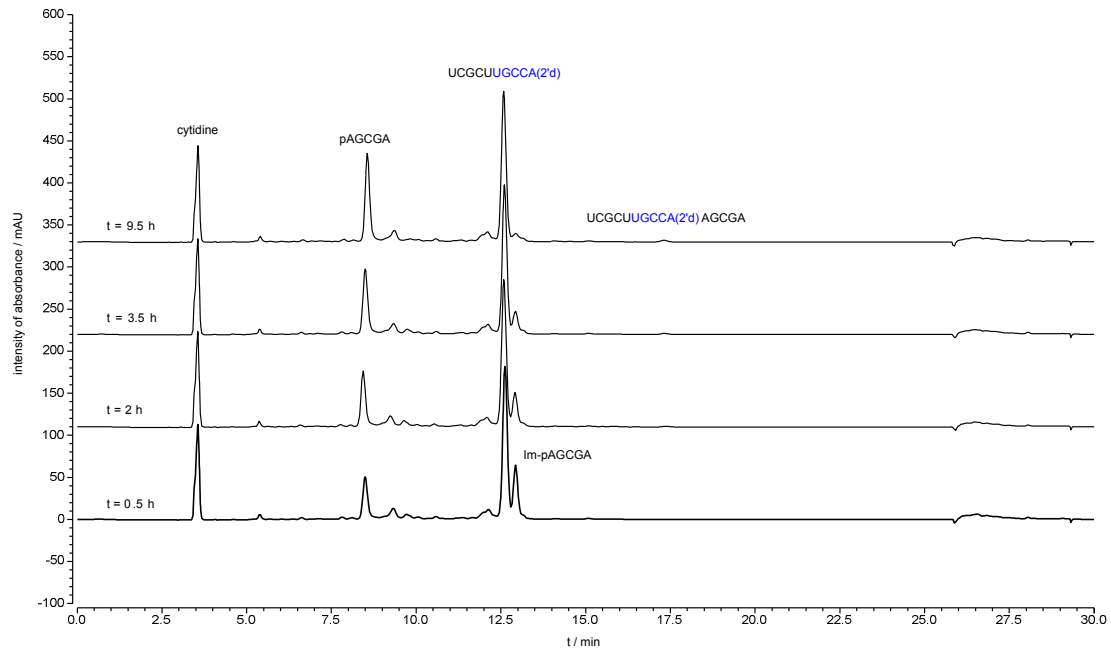

**Figure S16. Stacked HPLC traces of loop-closing ligation with UGCCA(2' d) overhang.**

Loop duplex sequence:

3' AGCGAp-Im

5' UGCUUGCCA(2' d)

Loop-closing ligation was monitored by HPLC with 260 nm UV detection. The solution was incubated at 20 °C and aliquots of 8  $\mu$ L were injected into an HPLC at different time points. Peaks for the phosphate donor, phosphate acceptor strands and the product of loop-closing ligation are indicated. Conditions: 50  $\mu$ L of reaction mixture, containing the phosphate donor strand (including Im-p-AGCGA and p-AGCGA, in total 50  $\mu$ M), the phosphate acceptor strand (5'-UGCUUGCCA(2'd)-3', 50  $\mu$ M), cytidine (internal standard, 200  $\mu$ M), NaCl (200 mM), MgCl<sub>2</sub> (50 mM), *N*-MeIm (50 mM) and HEPES (50 mM, pH 8), was incubated at 20 °C.

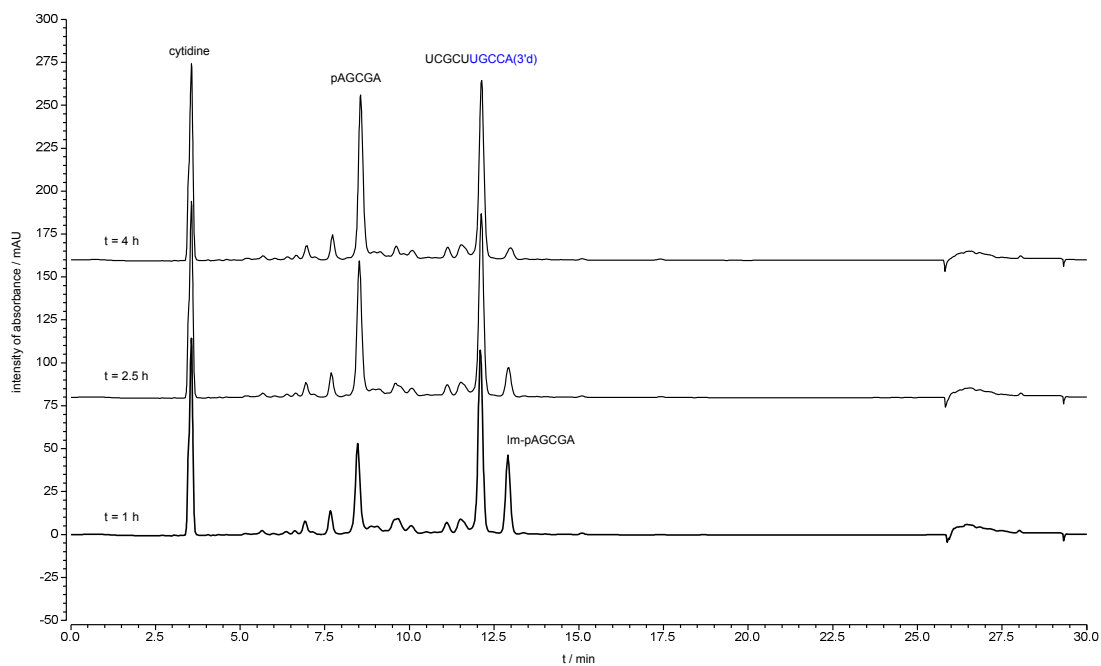

**Figure S17. Stacked HPLC traces of loop-closing ligation with UGCCA(3' d) overhang.**

Loop duplex sequence:

3' AGCGAp-Im

5' UGCUUGCCA(3' d)

Loop-closing ligation was monitored by HPLC with 260 nm UV detection. The solution was incubated at 20 °C and aliquots of 8  $\mu$ L were injected into an HPLC at different time points. Peaks for the phosphate donor, phosphate acceptor strands and the product of loop-closing ligation are indicated. Conditions: 50  $\mu$ L of reaction mixture, containing the phosphate donor strand (including Im-p-AGCGA and p-AGCGA, in total 50  $\mu$ M), the phosphate acceptor strand (5'-UGCUUGCCA(3'd)-3', 50  $\mu$ M), cytidine (internal standard, 200  $\mu$ M), NaCl (200 mM), MgCl<sub>2</sub> (50 mM), *N*-MeIm (50 mM) and HEPES (50 mM, pH 8), was incubated at 20 °C.

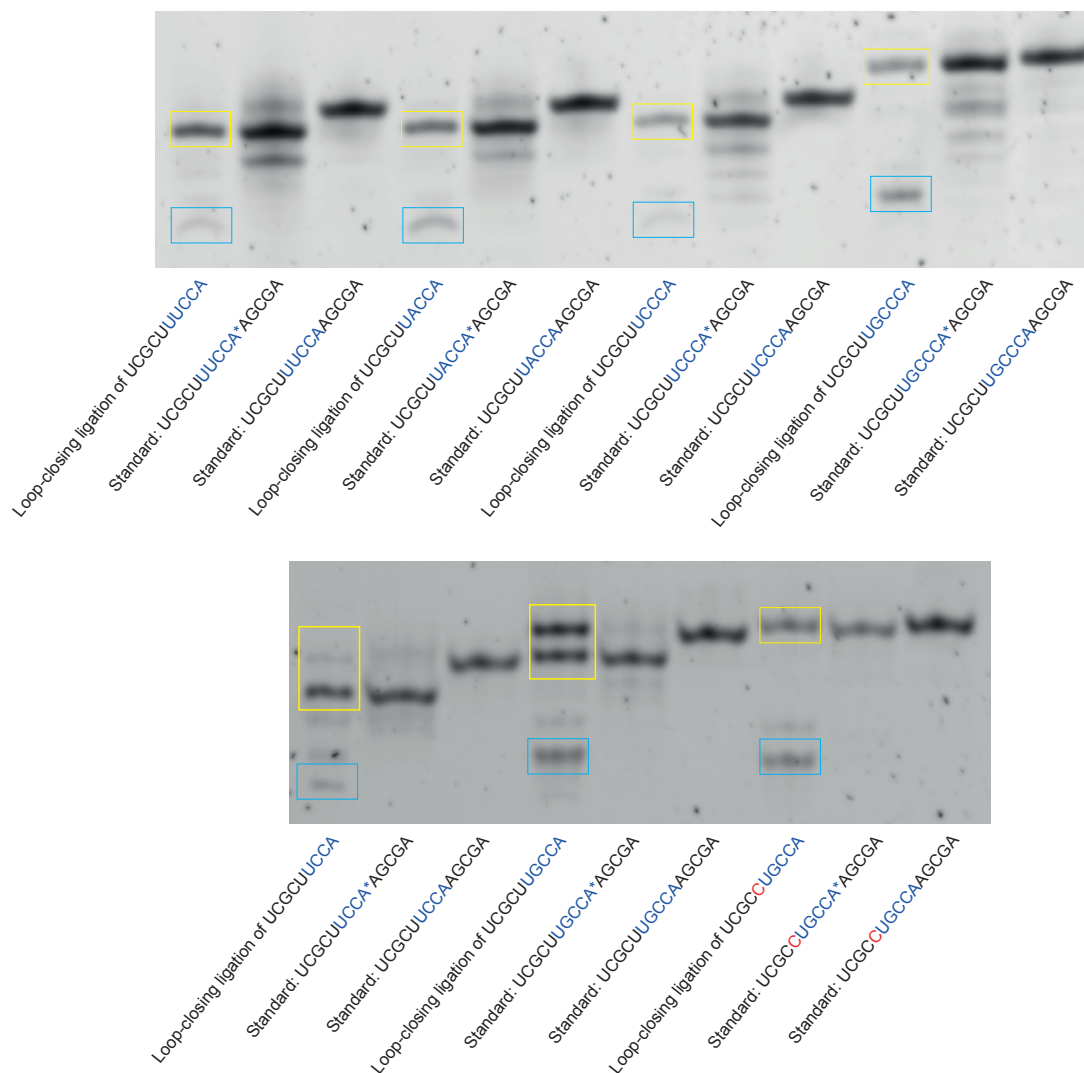

**Figure S18. Characterisation of the regioselectivity of loop-closing ligations by PAGE.** Starting materials (9 mer to 11 mer, Table 1) are indicated in blue boxes. Loop-closing ligation products are indicated in yellow boxes. A synthesised all- 3',5'-linkage authentic standard and an authentic standard with one 2',5'-linkage at the loop-closing position were both run in parallel on the gel for comparison. A\*A indicated the 2',5'-linkage between these two nucleosides. The gel was stained by using SYBR Gold Nucleic Acid Gel Stain (no dye-labelling of those oligos) before imaging. The newly formed phosphodiester bond was predominantly 2',5'-linked for those tested.

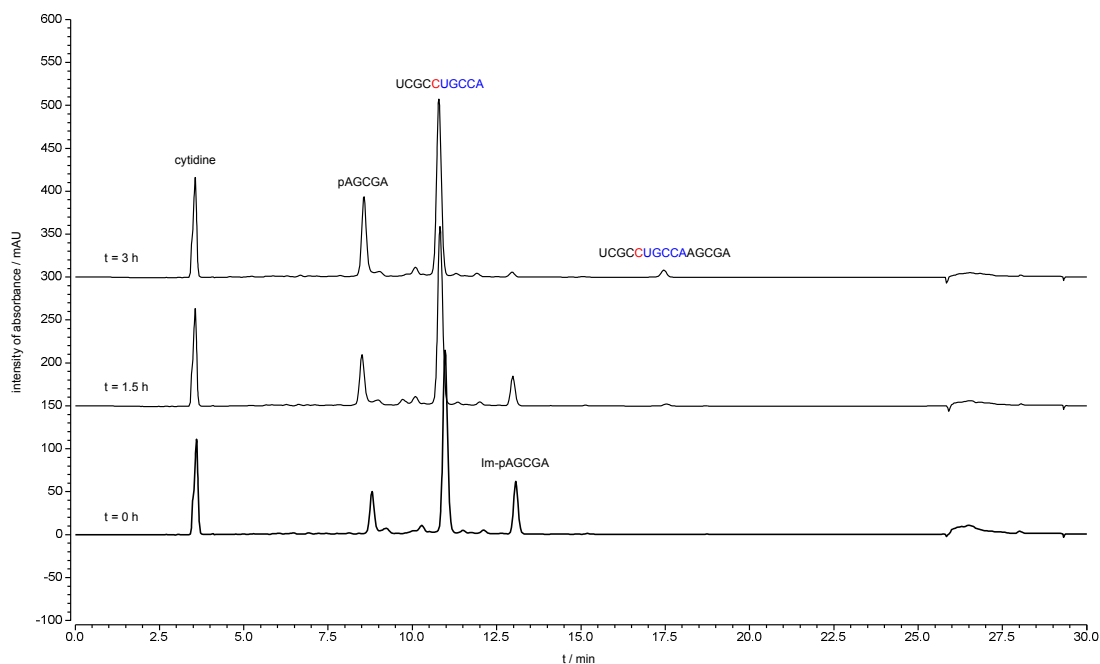

**Figure S19. Stacked HPLC traces of loop-closing ligation with CUGCCA overhang on 3'-end and**

**A on 5'-end.** Loop duplex sequence:

3' AGCGA<sub>p</sub>-Im

5' UGCCUGCCA

Loop-closing ligation was monitored by HPLC with 260 nm UV detection. The solution was incubated at 20 °C and aliquots of 8  $\mu$ L were injected into an HPLC at different time points. Peaks for the phosphate donor, phosphate acceptor strands and the product of loop-closing ligation are indicated. Conditions: 50  $\mu$ L of reaction mixture, containing the phosphate donor strand (including Im-p-AGCGA and p-AGCGA, in total 50  $\mu$ M), the phosphate acceptor strand (5'-UGCCUGCCA-3', 50  $\mu$ M), cytidine (internal standard, 200  $\mu$ M), NaCl (200 mM), MgCl<sub>2</sub> (50 mM), *N*-MeIm (50 mM) and HEPES (50 mM, pH 8), was incubated at 20 °C.

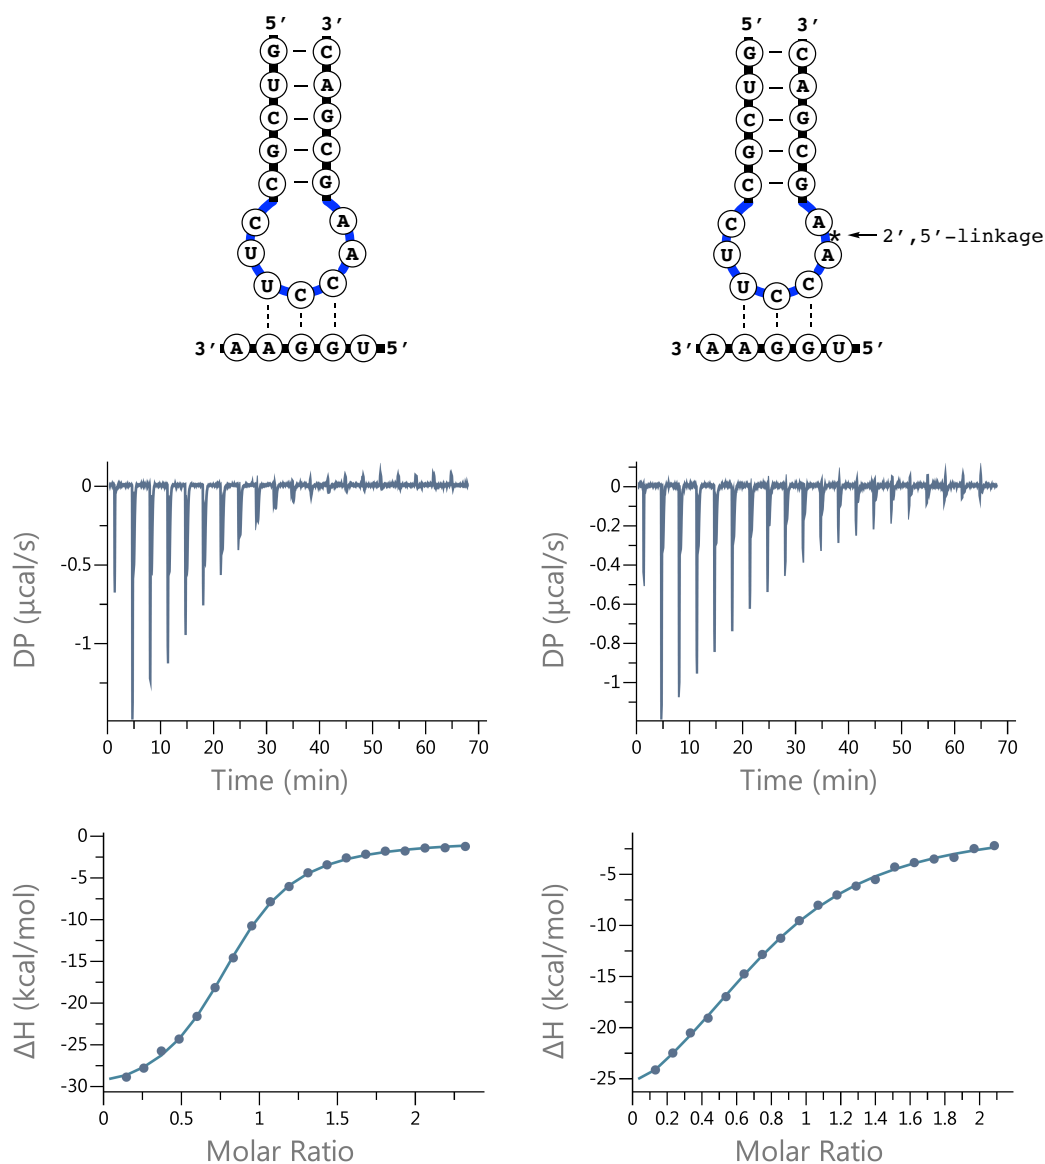

**Figure S20. ITC data for binding of anticodon loop to a penta-nucleotide containing the corresponding codon.** Left: using a loop containing all 3',5' linkages. Right: using a loop containing a 2',5' linkage between the positions equivalent to tRNA base 37 and 38.



A) Constructing an tRNA anticodon loop by enzymatic intron excision and loop-closing in biology

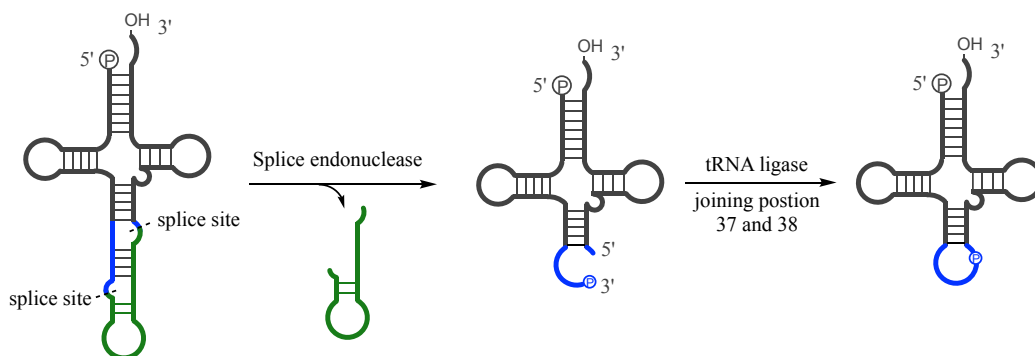

B) Non-enzymatic loop-closing ligation to join position 37 and 38 of a tRNA anticodon loop

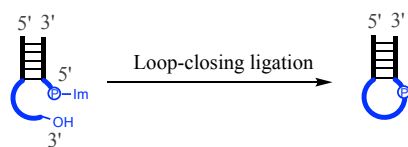

**Figure S21. Constructing an anticodon loop structure by loop-closing ligation reminiscent of the pre-tRNA processing of the anticodon loop in biology**

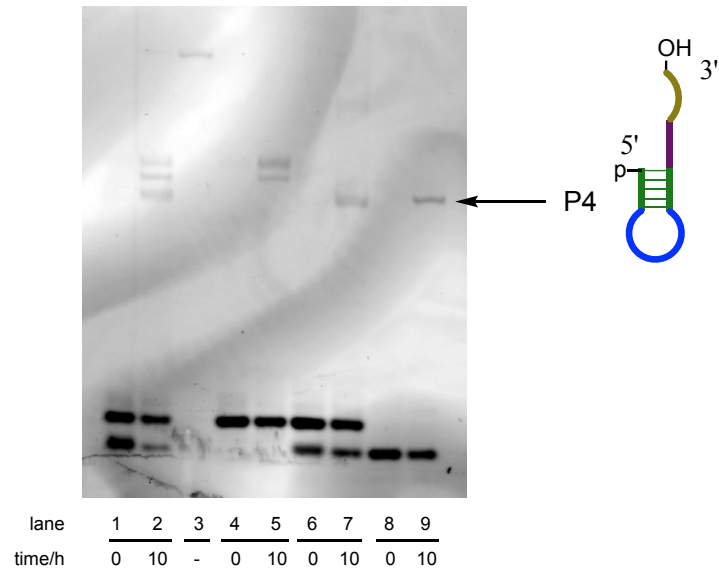

**Figure S22. Direct assembly a minihelix RNA structure by loop-closing ligation (SYBR gold staining of the RNA gel shown in Figure 2).** Lane 1&2, assembly reaction of Frg-1, Im-p-Frg-2 and Im-p-Frg-3; Lane 3, authentic standard of the minihelix RNA; Lane 4&5, reaction of Frg-1 and Im-p-Frg-3; Lane 6&7, reaction of Frg-1, Im-p-Frg-2 and p-Frg-3; Lane 8&9, reaction of p-Frg-2 and Im-p-Frg-3.

A) Assembly of a full-length ligase and the enzymatic ligation reaction

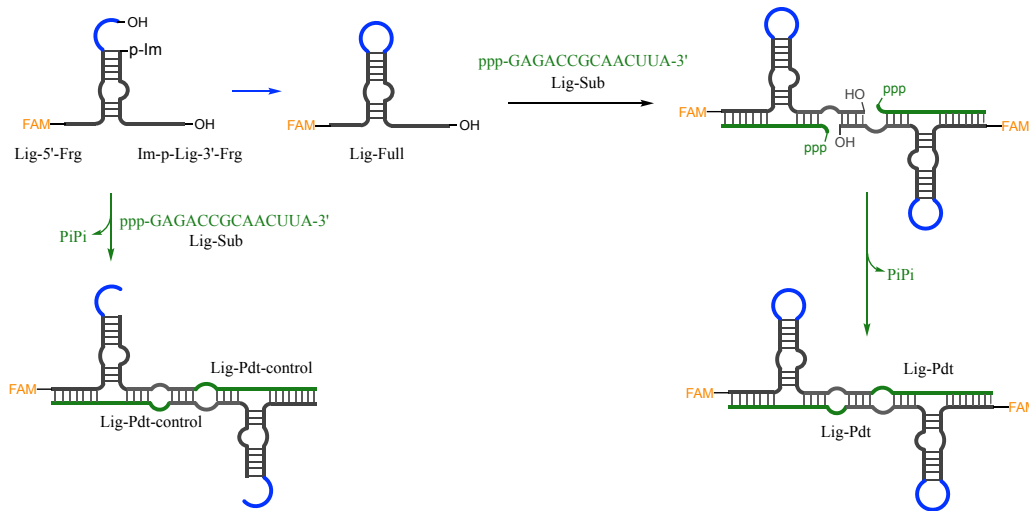

B) PAGE results of assembly and enzymatic assay reactions

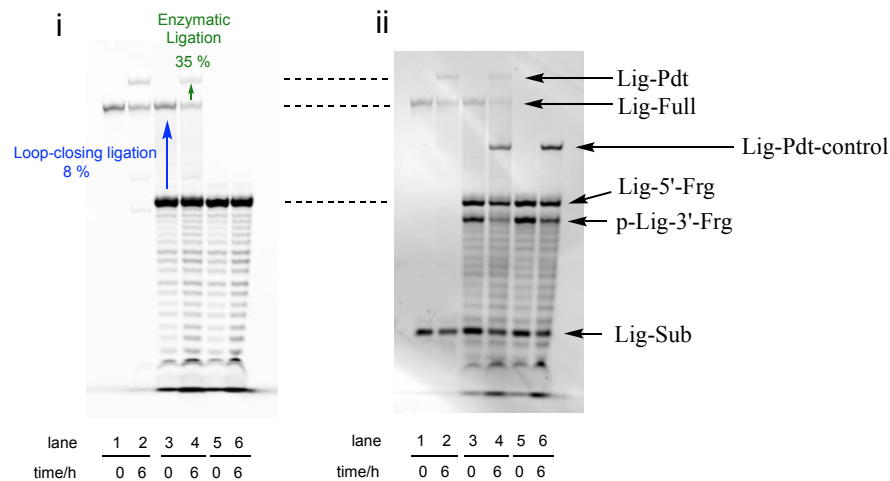

**Figure S23. Direct assembly of the Joyce ligase ribozyme and the enzymatic ligation assay.** A) Reaction scheme of the assembly of the ribozyme ligase and its subsequent enzymatic reaction. B) Representative PAGE gel electrophoresis for the assembly reaction and the enzymatic assay. i) Imaging based on FAM-labelling; ii) Imaging the same gel after SYBR-gold staining. Lane 1-2, positive control reaction of the Joyce ligase by using a pre-synthesised full-length ribozyme; Lane 3-4, enzymatic ligation reaction after loop-closing ligation; Lane 5-6, negative control without preceding loop-closing ligation.

| Phosphate donor | Phosphate acceptor sequence |          | pH  | Temperature | NaCl (mM) | MgCl <sub>2</sub> (mM) | <i>N</i> -MeIm (mM) | Observed yield | Corrected yield | Reaction half-life (h) |
|-----------------|-----------------------------|----------|-----|-------------|-----------|------------------------|---------------------|----------------|-----------------|------------------------|
|                 | Stem                        | Overhang |     |             |           |                        |                     |                |                 |                        |
| Im-p-AGCGA      | UCGCU                       | UGCCA    | 8.0 | 20 °C       | 200       | 50                     | 0                   | 9 %            | 16 %            | 40                     |
|                 |                             |          | 8.0 | 20 °C       | 200       | 50                     | 10                  | 18 %           | 30 %            | 7.5                    |
|                 |                             |          | 8.0 | 20 °C       | 200       | 50                     | 20                  | 17 %           | 28 %            | 3.3                    |
|                 |                             |          | 8.0 | 20 °C       | 200       | 50                     | 50                  | 18 %           | 30 %            | 1.8                    |
|                 |                             |          | 8.0 | 20 °C       | 200       | 50                     | 80                  | 18 %           | 30 %            | 1.3                    |
|                 |                             |          | 8.0 | 20 °C       | 200       | 50                     | 100                 | 18 %           | 30 %            | 1.0                    |
|                 |                             |          | 8.0 | 20 °C       | 200       | 50                     | 200                 | 17 %           | 28 %            | 0.5                    |
|                 |                             |          | 8.0 | 30 °C       | 200       | 50                     | 50                  | 16 %           | 27 %            | --                     |
|                 |                             |          | 8.0 | 4 °C        | 200       | 50                     | 50                  | 27 %           | 45 %            | --                     |

**Table S1. The reaction rates of loop-closing ligation depend on the concentration of *N*-methylimidazole (*N*-MeIm).** The blue colour highlights the reference condition.

Corrected yield = Observed yield divided by the initial fraction of Im-p-AGCGA present in the pre-synthesized mixture of Im-p-AGCGA & p-AGCGA (for synthetic methods see the SI). Reaction half-life,  $t_{1/2}$ , is the combined rate of first-order consumption of Im-p-AGCGA resulting from both loop-closing ligation and the competing hydrolysis. All yields and half-lives are average values from at least two independent experiments.

| Phosphate donor | Phosphate acceptor sequence |          | pH  | Temperature | NaCl (mM) | MgCl <sub>2</sub> (mM) | <i>N</i> -MeIm (mM) | Observed yield | Corrected yield | Reaction half-life (h) |
|-----------------|-----------------------------|----------|-----|-------------|-----------|------------------------|---------------------|----------------|-----------------|------------------------|
|                 | Stem                        | Overhang |     |             |           |                        |                     |                |                 |                        |
| Im-p-AGCGA      | UCGCU                       | UGCCA    | 5.2 | 20 °C       | 200       | 50                     | 50                  | 0 %            | 0 %             | 0.4                    |
|                 |                             |          | 6.0 | 20 °C       | 200       | 50                     | 50                  | < 1 %          | <1 %            | 0.5                    |
|                 |                             |          | 7.0 | 20 °C       | 200       | 50                     | 50                  | 5 %            | 8 %             | 0.5                    |
|                 |                             |          | 7.5 | 20 °C       | 200       | 50                     | 50                  | 12 %           | 18 %            | 0.6                    |
|                 |                             |          | 8.0 | 20 °C       | 200       | 50                     | 50                  | 18 %           | 30 %            | 1.8                    |
|                 |                             |          | 9.2 | 20 °C       | 200       | 50                     | 50                  | 16 %           | 27 %            | 6.7                    |

**Table S2. The pH-dependence of the loop-closing ligation.** The blue colour highlights the reference condition. All yields and half-lives are average values from at least two independent experiments.

| Phosphate donor | Phosphate acceptor sequence |          | pH  | Temperature | NaCl (mM) | MgCl <sub>2</sub> (mM) | <i>N</i> -MeIm (mM) | Observed yield | Corrected yield | Reaction half-life (h) |
|-----------------|-----------------------------|----------|-----|-------------|-----------|------------------------|---------------------|----------------|-----------------|------------------------|
|                 | Stem                        | Overhang |     |             |           |                        |                     |                |                 |                        |
| Im-p-AGCGA      | UCGCU                       | UGCCA    | 8.0 | 20 °C       | 200       | 0                      | 50                  | 2 %            | 3 %             | 0.8                    |
|                 |                             |          | 8.0 | 20 °C       | 200       | 10                     | 50                  | 6 %            | 10 %            | 1.1                    |
|                 |                             |          | 8.0 | 20 °C       | 200       | 20                     | 50                  | 13 %           | 21 %            | 1.4                    |
|                 |                             |          | 8.0 | 20 °C       | 200       | 50                     | 50                  | 19 %           | 31 %            | 1.8                    |
|                 |                             |          | 8.0 | 20 °C       | 200       | 100                    | 50                  | 25 %           | 41 %            | 2.4                    |
|                 |                             |          | 8.0 | 20 °C       | 200       | 200                    | 50                  | 29 %           | 48 %            | 2.9                    |
|                 |                             |          | 8.0 | 20 °C       | 200       | 500                    | 50                  | 29 %           | 48 %            | 4.9                    |

**Table S3. The yields of loop-closing ligation depend on concentration of MgCl<sub>2</sub>.** The blue colour highlights the reference condition. All yields and half-lives are average values from at least two independent experiments.

| Phosphate Donor | Phosphate acceptor sequence |          | pH  | Temperature | NaCl (mM) | MgCl <sub>2</sub> (mM) | <i>N</i> -MeIm (mM) | Observed yield | Corrected yield | Reaction half-life (h) |
|-----------------|-----------------------------|----------|-----|-------------|-----------|------------------------|---------------------|----------------|-----------------|------------------------|
|                 | Stem                        | Overhang |     |             |           |                        |                     |                |                 |                        |
| Im-p-AGCGA      | UCGCU                       | UGCCA    | 8.0 | 20 °C       | 0         | 0                      | 50                  | 1 %            | 2 %             | 0.4                    |
|                 |                             |          | 8.0 | 20 °C       | 100       | 0                      | 50                  | 3 %            | 4 %             | 0.7                    |
|                 |                             |          | 8.0 | 20 °C       | 200       | 0                      | 50                  | 4 %            | 6 %             | 1.0                    |
|                 |                             |          | 8.0 | 20 °C       | 500       | 0                      | 50                  | 5 %            | 10 %            | 1.5                    |
|                 |                             |          | 8.0 | 20 °C       | 1000      | 0                      | 50                  | 6 %            | 15 %            | 2.2                    |
|                 |                             |          | 8.0 | 20 °C       | 2000      | 0                      | 50                  | 16 %           | 22 %            | 3.9                    |

**Table S4. The yields of loop-closing ligation depend on concentration of NaCl.** The blue colour highlights the reference condition. All yields and half-lives are average values from at least two independent experiments.
